# Supplementary material for: Association of Mutation Profiles with Postoperative Survival in Patients with Non–Small Cell Lung Cancer
Source: PubMed Central journal article supplement (PMC7700403; doi:10.3390/cancers12113472), 2020-11-21
Supplement: cancers-12-03472-s001.pdf [file cancers-12-03472-s001.pdf]

Article

# Association of Mutation Profiles with Postoperative Survival in Patients with Non-Small Cell Lung Cancer

Taichiro Goto, Kei Kunimasa, Yosuke Hirotsu, Takahiro Nakagomi, Yujiro Yokoyama, Rumi Higuchi, Sotaro Otake, Toshio Oyama, Kenji Amemiya, Hitoshi Mochizuki, and Masao Omata

## Supplementary Materials

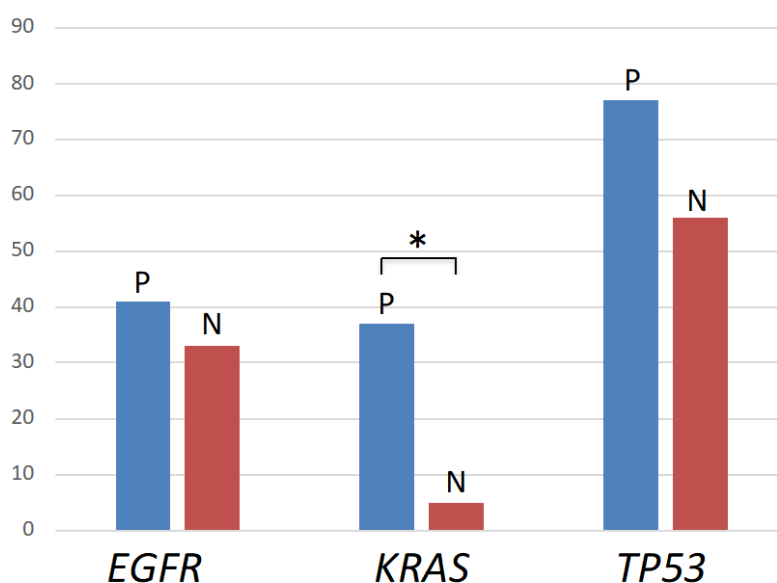

**Figure S1.** Pathogenic versus nonpathogenic mutations. The distribution of pathogenic and nonpathogenic mutations in epidermal growth factor receptor (*EGFR*), *KRAS*, and tumor protein p53 (*TP53*) is shown. *KRAS* mutations were significantly more frequently pathogenic than *EGFR* and *TP53*. Blue and red bars denote pathogenic and nonpathogenic mutations, respectively. \*,  $p < 0.05$ .

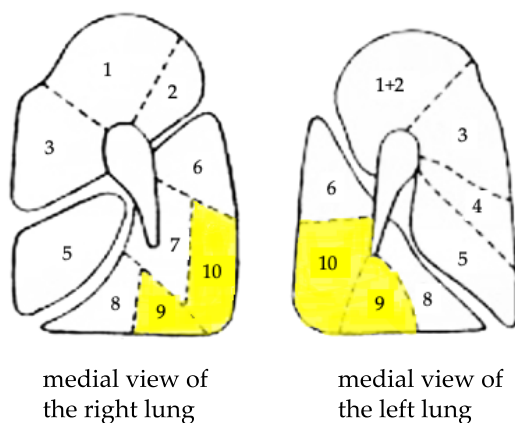

**Figure S2.** Explanatory schemes of the anatomical lung segments. Segments 9 and 10, the dorsal inferior lobes, were highlighted in yellow.

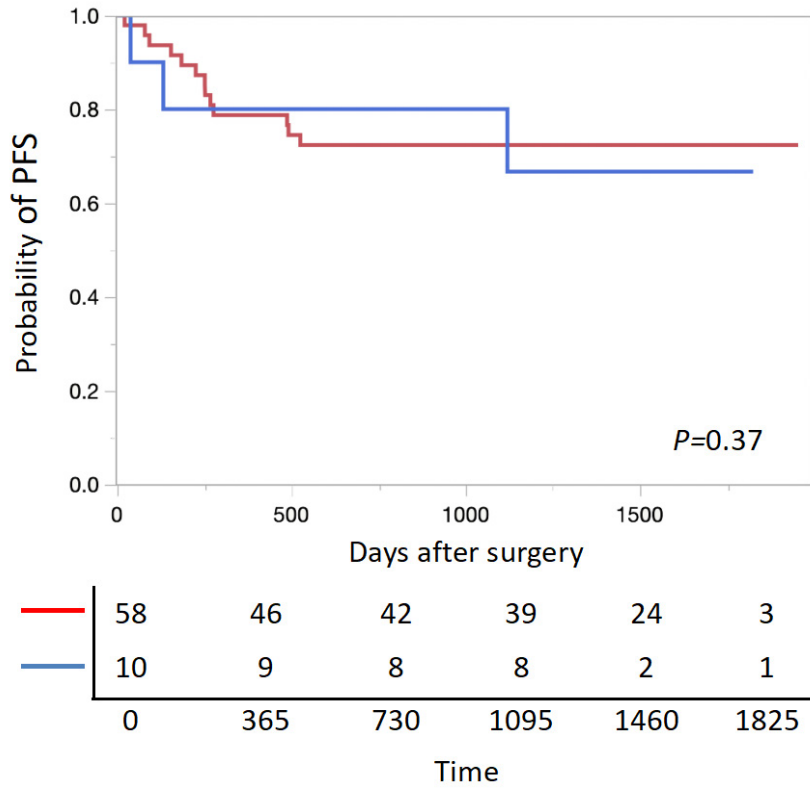

**Figure S3.** Locational variation in prognosis of lung cancers without *TP53* mutations. The prognosis was not significantly different between lung cancers without *TP53* mutations located in segments 9 and 10 and those located in segments 1 to 8. Blue and red lines denote tumors located in segments 9–10 and 1–8 ( $n = 10$  and  $58$ ), respectively.

Table S1. Pathogenic variants identified in our assay.

|    | #_locus         | type  | ref                      | genotype                   | normal genotype                                   | gene     | transcript     | function                  | codon | exon | protein            | coding                        |
|----|-----------------|-------|--------------------------|----------------------------|---------------------------------------------------|----------|----------------|---------------------------|-------|------|--------------------|-------------------------------|
| 1  | chr17:7577539   | SNV   | G                        | G/A                        | G/G                                               | TP53     | NM_000546.5    | missense                  | TGG   | 7    | p.Arg248Trp        | c.742C>T                      |
| 2  | chr10:89692985  | SNV   | G                        | G/T                        | G/G                                               | PTEN     | NM_000314.6    | nonsense                  | TAA   | 5    | p.Glu157Ter        | c.469G>T                      |
| 3  | chr17:7578446   | SNV   | T                        | T/A                        | T/T                                               | TP53     | NM_000546.5    | missense                  | TTC   | 5    | p.Ile162Phe        | c.484A>T                      |
| 4  | chr17:7578478   | SNV   | G                        | G/A                        | G/G                                               | TP53     | NM_000546.5    | missense                  | CTC   | 5    | p.Pro151Leu        | c.452C>T                      |
| 5  | chr12:25398285  | SNV   | C                        | C/A                        | C/C                                               | KRAS     | NM_033360.3    | missense                  | TGT   | 2    | p.Gly12Cys         | c.34G>T                       |
| 6  | chr12:56478947  | SNV   | C                        | C/T                        | C/C                                               | ERBB3    | NM_001982.3    | missense                  | TGC   | 3    | p.Arg135Cys        | c.403C>T                      |
| 7  | chr19:11105657  | SNV   | G                        | G/A                        | G/G                                               | SMARCA4  | NM_001128849.1 | missense                  | AAG   | 9    | p.Glu525Lys        | c.1573G>A                     |
| 8  | chr1:27106180   | SNV   | G                        | G/A                        | G/G                                               | ARID1A   | NM_006015.5    | missense                  | AAG   | 20   | p.Glu1931Lys       | c.5791G>A                     |
| 9  | chr16:3820572   | SNV   | G                        | G/A                        | G/G                                               | CREBBP   | NM_004380.2    | missense                  | CTG   | 14   | p.Pro960Leu        | c.2879C>T                     |
| 10 | chr13:49027160  | SNV   | C                        | C/T                        | C/C                                               | RB1      | NM_000321.2    | missense                  | TTA   | 18   | p.Ser576Leu        | c.1727C>T                     |
| 11 | chr15:41961591  | SNV   | C                        | C/T                        | C/C                                               | MGA      | NM_001164273.1 | missense                  | TAT   | 2    | p.His167Tyr        | c.499C>T                      |
| 12 | chr17:29528441  | SNV   | C                        | C/T                        | C/C                                               | NF1      | NM_001042492.2 | nonsense                  | TAG   | 11   | p.Gln400Ter        | c.1198C>T                     |
| 13 | chr3:41266085   | SNV   | C                        | C/T                        | C/C                                               | C11orf91 | NM_001904.3    | nonsense                  | TAG   | 3    | p.Gln28Ter         | c.82C>T                       |
| 14 | chr12:46230632  | SNV   | G                        | G/A                        | G/G                                               | ARID2    | NM_152641.3    | missense                  | AAA   | 8    | p.Arg294Lys        | c.881G>A                      |
| 15 | chr12:56481856  | SNV   | C                        | C/T                        | C/C                                               | ERBB3    | NM_001982.3    | missense                  | TCT   | 7    | p.Pro262Ser        | c.784C>T                      |
| 16 | chr17:29687586  | SNV   | G                        | G/A                        | G/G                                               | NF1      | NM_001042492.2 | missense                  | AAA   | 57   | p.Glu2748Lys       | c.8242G>A                     |
| 17 | chr3:41266118   | SNV   | G                        | G/A                        | G/G                                               | C11orf91 | NM_001904.3    | missense                  | ACC   | 3    | p.Ala39Thr         | c.115G>A                      |
| 18 | chr16:3831298   | SNV   | G                        | G/A                        | G/G                                               | CREBBP   | NM_004380.2    | missense                  | CTA   | 7    | p.Pro528Leu        | c.1583C>T                     |
| 19 | chr7:116418932  | SNV   | G                        | G/A                        | G/G                                               | MET      | NM_001127500.2 | missense                  | CAA   | 17   | p.Arg1166Gln       | c.3497G>A                     |
| 20 | chr12:46205250  | SNV   | G                        | G/A                        | G/G                                               | ARID2    | NM_152641.3    | missense                  | AAG   | 4    | p.Glu1121Lys       | c.334G>A                      |
| 21 | chr7:55268881   | SNV   | G                        | G/A                        | G/G                                               | EGFR     | NM_005228.4    | missense                  | AGG   | 25   | p.Gly983Arg        | c.2947G>A                     |
| 22 | chr7:55241656   | SNV   | G                        | G/A                        | G/G                                               | EGFR     | NM_005228.4    | missense                  | ACT   | 18   | p.Ala702Thr        | c.2104G>A                     |
| 23 | chr7:116381066  | SNV   | C                        | C/T                        | C/C                                               | MET      | NM_001127500.2 | missense                  | CTT   | 5    | p.Pro563Leu        | c.1688C>T                     |
| 24 | chr1:243716098  | SNV   | G                        | G/A                        | G/G                                               | AKT3     | NM_005465.4    | missense                  | TCT   | 10   | p.Pro366Ser        | c.1096C>T                     |
| 25 | chr16:3824662   | SNV   | T                        | T/C                        | T/T                                               | CREBBP   | NM_004380.2    | missense                  | GAC   | 12   | p.Asn731Asp        | c.2191A>G                     |
| 26 | chr10:123247617 | SNV   | C                        | C/T                        | C/C                                               | FGFR2    | NM_000141.4    | missense                  | CAA   | 14   | p.Arg625Gln        | c.1874G>A                     |
| 27 | chr17:29665110  | SNV   | C                        | C/T                        | C/C                                               | NF1      | NM_001042492.2 | nonsense                  | TGA   | 45   | p.Arg2258Ter       | c.6772C>T                     |
| 28 | chr1:27092809   | SNV   | C                        | C/T                        | C/C                                               | ARID1A   | NM_006015.5    | nonsense                  | TAG   | 9    | p.Gln944Ter        | c.2830C>T                     |
| 29 | chr17:29701087  | SNV   | C                        | C/T                        | C/C                                               | NF1      | NM_001042492.2 | nonsense                  | TGA   | 58   | p.Arg2812Ter       | c.8434C>T                     |
| 30 | chr16:3778455   | SNV   | A                        | A/T                        | A/A                                               | CREBBP   | NM_004380.2    | missense                  | CAG   | 31   | p.Leu2198Gln       | c.6593T>A                     |
| 31 | chr6:93967868   | SNV   | C                        | C/T                        | C/C                                               | EPHA7    | NM_004440.3    | missense                  | AGG   | 11   | p.Gly687Arg        | c.2059G>A                     |
| 32 | chr9:139396309  | SNV   | C                        | C/T                        | C/C                                               | NOTCH1   | NM_017617.4    | nonsense                  | TGA   | 30   | p.Trp1843Ter       | c.5529G>A                     |
| 33 | chr17:37881648  | SNV   | G                        | G/A                        | G/G                                               | ERBB2    | NM_004448.3    | nonsense                  | TGA   | 22   | p.Trp906Ter        | c.2718G>A                     |
| 34 | chr6:93982080   | SNV   | G                        | G/A                        | G/G                                               | EPHA7    | NM_004440.3    | missense                  | TTC   | 6    | p.Ser462Phe        | c.1385C>T                     |
| 35 | chr9:135781149  | SNV   | G                        | G/A                        | G/G                                               | TSC1     | NM_000368.4    | missense                  | TAT   | 15   | p.His606Tyr        | c.1816G>T                     |
| 36 | chr17:29657406  | SNV   | C                        | C/T                        | C/C                                               | NF1      | NM_001042492.2 | missense                  | CTT   | 39   | p.Pro1901Leu       | c.5702C>T                     |
| 37 | chr1:27087515   | SNV   | C                        | C/T                        | C/C                                               | ARID1A   | NM_006015.5    | missense                  | TCG   | 5    | p.Pro697Ser        | c.2089C>T                     |
| 38 | chr11:118343316 | SNV   | G                        | G/A                        | G/G                                               | KMT2A    | NM_001197104.1 | missense                  | AAC   | 3    | p.Ser481Asn        | c.1442G>A                     |
| 39 | chr12:25378571  | SNV   | C                        | C/T                        | C/C                                               | KRAS     | NM_033360.3    | missense                  | AAA   | 4    | p.Glu143Lys        | c.427G>A                      |
| 40 | chr12:46243909  | SNV   | C                        | C/A                        | C/C                                               | ARID2    | NM_152641.3    | missense                  | TAT   | 15   | p.Ser668Tyr        | c.2003C>A                     |
| 41 | chr16:2115635   | SNV   | A                        | A/G                        | A/A                                               | TSC2     | NM_000548.4    | missense                  | CGG   | 16   | p.Gln572Arg        | c.1715A>G                     |
| 42 | chr7:55242464   | INDEL | AGGAAT<br>TAAGAG<br>AAGC | AGGAATTA<br>AGAGAAG<br>C/A | AGGAATTA<br>AGAGAAG<br>C/AGGAAT<br>TAAGAGAA<br>GC | EGFR     | NM_005228.3    | nonframeshift<br>Deletion | -     | 19   | p.Glu746_Ala750del | c.2235_2249delGGAATTAAGAGAAGC |
| 43 | chr13:49050864  | SNV   | C                        | C/T                        | C/C                                               | RB1      | NM_000321.2    | nonsense                  | TAG   | 25   | p.Gln850Ter        | c.2548C>T                     |
| 44 | chr13:48934194  | SNV   | C                        | C/T                        | C/C                                               | RB1      | NM_000321.2    | nonsense                  | TAG   | 7    | p.Gln217Ter        | c.649C>T                      |
| 45 | chr19:1221247   | SNV   | G                        | G/A                        | G/G                                               | STK11    | NM_000455.4    | missense                  | GAG   | 6    | p.Gly257Glu        | c.770G>C                      |
| 46 | chr17:7579355   | SNV   | A                        | A/G                        | A/A                                               | TP53     | NM_000546.5    | missense                  | CCG   | 4    | p.Leu111Pro        | c.332T>C                      |
| 47 | chr17:7578242   | SNV   | C                        | C/A                        | C/C                                               | TP53     | NM_000546.5    | missense                  | TTG   | 6    | p.Val203Leu        | c.607G>T                      |
| 48 | chr13:48881438  | SNV   | G                        | G/T                        | G/G                                               | RB1      | NM_000321.2    | nonsense                  | TAA   | 2    | p.Glu54Ter         | c.160G>T                      |
| 49 | chr13:48955499  | SNV   | G                        | G/T                        | G/G                                               | RB1      | NM_000321.2    | nonsense                  | TAA   | 17   | p.Glu539Ter        | c.1615G>T                     |
| 50 | chr17:7576897   | SNV   | G                        | G/A                        | G/G                                               | TP53     | NM_000546.5    | nonsense                  | TAG   | 9    | p.Gln317Ter        | c.949C>T                      |

|     |                 |     |                |                              |                                         |                                         |                |             |          |     |              |             |          |
|-----|-----------------|-----|----------------|------------------------------|-----------------------------------------|-----------------------------------------|----------------|-------------|----------|-----|--------------|-------------|----------|
| 51  | chr19:10610247  | SNV | C              | C/A                          | C/C                                     | KEAP1                                   | NM_203500.1    | missense    | TTC      | 2   | p.Val155Phe  | c.463G>T    |          |
| 52  | chr19:11098593  | SNV | G              | G/T                          | G/G                                     | SMARCA4                                 | NM_001128849.1 | nonsense    | TAG      | 6   | p.Glu371Ter  | c.1111G>T   |          |
| 53  | chr18:48591919  | SNV | G              | G/A                          | G/G                                     | SMAD4                                   | NM_005359.5    | missense    | CAC      | 9   | p.Arg361His  | c.1082G>A   |          |
| 54  | chr3:41280804   | SNV | C              | C/T                          | C/C                                     | CTNNB1                                  | NM_001904.3    | nonsense    | TAG      | 15  | p.Gln773Ter  | c.2317C>T   |          |
| 55  | chr9:21971138   | SNV | C              | C/A                          | C/C                                     | CDKN2A                                  | NM_000077.4    | missense    | TAC      | 2   | p.Asp74Tyr   | c.220G>T    |          |
| 56  | chr19:10610265  | SNV | C              | C/T                          | C/C                                     | KEAP1                                   | NM_203500.1    | missense    | AAG      | 2   | p.Glu149Lys  | c.445G>A    |          |
| 57  | chr9:21971036   | SNV | C              | C/A                          | C/C                                     | CDKN2A                                  | NM_000077.4    | missense    | TAT      | 2   | p.Asp108Tyr  | c.322G>T    |          |
| 58  | chr2:178098959  | SNV | T              | T/C                          | T/T                                     | NFE2L2                                  | NM_006164.4    | missense    | GGT      | 2   | p.Asp29Gly   | c.86A>G     |          |
| 59  | chr13:48955538  | SNV | C              | C/T                          | C/C                                     | RB1                                     | NM_000321.2    | nonsense    | TGA      | 17  | p.Arg52Ter   | c.1654C>T   |          |
| 60  | chr2:225360596  | SNV | T              | T/C                          | T/T                                     | CUL3                                    | NM_003590.4    | missense    | GTG      | 13  | p.Met599Val  | c.1795A>G   |          |
| 61  | chr17:7577120   | SNV | CG             | CG/AG                        | CG/CG                                   | TP53                                    | NM_000546.5    | missense    | CTT      | 8   | p.Arg273Leu  | c.818G>T    |          |
| 62  | chr17:7577553   | SNV |                | ATGCAG<br>GAACTG<br>T        | ATGCAGG<br>AACTGT/AT<br>GCAGGAA<br>CTGC | ATGCAGG<br>AACTGT/AT<br>GCAGGAA<br>CTGT | TP53           | NM_000546.5 | missense | AGC | 7            | p.Asn239Ser | c.716A>G |
| 63  | chr17:7578275   | SNV | G              | G/A                          | G/G                                     | TP53                                    | NM_000546.5    | nonsense    | TAG      | 6   | p.Gln192Ter  | c.574C>T    |          |
| 64  | chr17:7578265   | SNV | A              | A/G                          | A/A                                     | TP53                                    | NM_000546.5    | missense    | ACC      | 6   | p.Ile195Thr  | c.584T>C    |          |
| 65  | chr1:243736329  | SNV | C              | C/T                          | C/C                                     | AKT3                                    | NM_005465.4    | missense    | AAG      | 8   | p.Glu240Lys  | c.718G>A    |          |
| 66  | chr17:7577550   | SNV | C              | C/A                          | C/C                                     | TP53                                    | NM_000546.5    | missense    | GTC      | 7   | p.Gly244Val  | c.731G>T    |          |
| 67  | chr17:7578534   | SNV | CTTG           | CTTG/ATGG                    | CTTG/CTTG                               | TP53                                    | NM_000546.5    | missense    | AAT      | 5   | p.Lys132Asn  | c.396G>T    |          |
| 68  | chr17:7577546   | SNV | GCC            | GCC/GCT                      | GCC/GCC                                 | TP53                                    | NM_000546.5    | missense    | AGC      | 7   | p.Gly245Ser  | c.733G>A    |          |
| 69  | chr11:108202607 | SNV | T              | T/C                          | T/T                                     | ATM                                     | NM_000051.3    | missense    | CCA      | 52  | p.Leu254Pro  | c.7631T>C   |          |
| 70  | chr22:41573941  | SNV | G              | G/T                          | G/G                                     | EP300                                   | NM_001429.3    | missense    | TCC      | 31  | p.Ala2076Ser | c.6226G>T   |          |
| 71  | chr2:178098960  | SNV | C              | C/T                          | C/C                                     | NFE2L2                                  | NM_006164.4    | missense    | AAT      | 2   | p.Asp29Asn   | c.85G>A     |          |
| 72  | chr12:25398284  | SNV | C              | C/A                          | C/C                                     | KRAS                                    | NM_033360.3    | missense    | GTT      | 2   | p.Gly12Val   | c.35G>T     |          |
| 73  | chr12:49426814  | SNV | G              | G/A                          | G/G                                     | KMT2D                                   | NM_003482.3    | nonsense    | TAG      | 39  | p.Gln3892Ter | c.11674C>T  |          |
| 74  | chr7:55241706   | SNV | GG             | GG/GT                        | GG/GG                                   | EGFR                                    | NM_005228.3    | missense    | TGC      | 18  | p.Gly719Cys  | c.2155G>T   |          |
| 75  | chr17:7578280   | SNV | G              | G/A                          | G/G                                     | TP53                                    | NM_000546.5    | missense    | CTT      | 6   | p.Pro190Leu  | c.569C>T    |          |
| 76  | chr17:7578526   | SNV | CAA            | CAA/CAT                      | CAA/CAA                                 | TP53                                    | NM_000546.5    | missense    | TTA      | 5   | p.Phe134Leu  | c.402T>A    |          |
| 77  | chr17:7573976   | SNV | T              | T/A                          | T/T                                     | TP53                                    | NM_000546.5    | nonsense    | TAG      | 10  | p.Lys351Ter  | c.1051A>T   |          |
| 78  | chr17:29677306  | SNV | A              | A/T                          | A/A                                     | NF1                                     | NM_001042492.2 | missense    | TTT      | 50  | p.Tyr2476Phe | c.7427A>T   |          |
| 79  | chr10:123353315 | SNV | C              | C/G                          | C/C                                     | FGFR2                                   | NM_000141.4    | missense    | CCT      | 2   | p.Arg6Pro    | c.17G>C     |          |
| 80  | chr17:7577578   | SNV | TGTA           | TGTA/TTTA                    | TGTA/TGTA                               | TP53                                    | NM_000546.5    | nonsense    | TAA      | 7   | p.Tyr234Ter  | c.702C>A    |          |
| 81  | chr1:115256528  | SNV | TTG            | TTG/TTT                      | TTG/TTG                                 | NRAS                                    | NM_002524.4    | missense    | AAA      | 3   | p.Gln61Lys   | c.181C>A    |          |
| 82  | chr3:41280704   | SNV | G              | G/A                          | G/G                                     | CTNNB1                                  | NM_001904.3    | missense    | ATA      | 15  | p.Met139Ile  | c.2217G>A   |          |
| 83  | chr2:178098974  | SNV | C              | C/G                          | C/C                                     | NFE2L2                                  | NM_006164.4    | missense    | TCG      | 2   | p.Tip24Ser   | c.71G>C     |          |
| 84  | chr12:56495023  | SNV | G              | G/A                          | G/G                                     | ERBB3                                   | NM_001982.3    | missense    | CAC      | 27  | p.Arg1127His | c.3380G>A   |          |
| 85  | chr17:7577544   | SNV | AT             | AT/AC                        | AT/AT                                   | TP53                                    | NM_000546.5    | missense    | GTG      | 7   | p.Met246Val  | c.736A>G    |          |
| 86  | chr17:7578552   | SNV | GT             | GT/GC                        | GT/GT                                   | TP53                                    | NM_000546.5    | missense    | TGC      | 5   | p.Tyr126Cys  | c.377A>G    |          |
| 87  | chr13:48941648  | SNV | C              | C/T                          | C/C                                     | RB1                                     | NM_000321.2    | nonsense    | TGA      | 10  | p.Arg320Ter  | c.958C>T    |          |
| 88  | chr19:11130300  | SNV | C              | C/T                          | C/C                                     | SMARCA4                                 | NM_001128849.1 | nonsense    | TAG      | 18  | p.Gln847Ter  | c.2539C>T   |          |
| 89  | chr17:7577022   | SNV | G              | G/A                          | G/G                                     | TP53                                    | NM_000546.5    | nonsense    | TGA      | 8   | p.Arg306Ter  | c.916C>T    |          |
| 90  | chr17:7577514   | SNV | G              | G/T                          | G/G                                     | TP53                                    | NM_000546.5    | missense    | AAA      | 7   | p.Thr256Lys  | c.767C>A    |          |
| 91  | chr17:37868208  | SNV | C              | C/T                          | C/C                                     | ERBB2                                   | NM_004448.3    | missense    | TTC      | 8   | p.Ser310Phe  | c.929C>T    |          |
| 92  | chr17:7578475   | SNV | G              | G/A                          | G/G                                     | TP53                                    | NM_000546.5    | missense    | CTG      | 5   | p.Pro152Leu  | c.455C>T    |          |
| 93  | chr17:7578406   | SNV | C              | C/A                          | C/C                                     | TP53                                    | NM_000546.5    | missense    | CTC      | 5   | p.Arg175Leu  | c.524G>T    |          |
| 94  | chr3:178936091  | SNV | G              | G/A                          | G/G                                     | PIK3CA                                  | NM_006218.2    | missense    | AAG      | 10  | p.Glu545Lys  | c.1633G>A   |          |
| 95  | chr19:10602878  | SNV | G              | G/A                          | G/G                                     | KEAP1                                   | NM_203500.1    | missense    | TGG      | 3   | p.Arg234Trp  | c.700C>T    |          |
| 96  | chr16:3807902   | SNV | G              | G/A                          | G/G                                     | CREBBP                                  | NM_004380.2    | nonsense    | TGA      | 18  | p.Arg1173Ter | c.3517C>T   |          |
| 97  | chr17:7577108   | SNV | C              | C/A                          | C/C                                     | TP53                                    | NM_000546.5    | missense    | TTT      | 8   | p.Cys277Phe  | c.830G>T    |          |
| 98  | chr2:178098816  | SNV | C              | C/A                          | C/C                                     | NFE2L2                                  | NM_006164.4    | missense    | TAT      | 2   | p.Asp77Tyr   | c.229G>T    |          |
| 99  | chr17:7578452   | SNV | TGGCGC<br>GGAC | TGGCGCG<br>GAC/TGGC<br>GGGAC | TGGCGCG<br>GAC/TGGC<br>GCGGAC           | TP53                                    | NM_000546.5    | missense    | CCC      | 5   | p.Arg158Pro  | c.473G>C    |          |
| 100 | chr15:66727455  | SNV | G              | G/T                          | G/G                                     | MAP2K1                                  | NM_002755.3    | missense    | AAT      | 2   | p.Lys57Asn   | c.171G>T    |          |
| 101 | chr12:25380275  | SNV | T              | T/G                          | T/T                                     | KRAS                                    | NM_033360.3    | missense    | CAC      | 3   | p.Gln61His   | c.183A>C    |          |
| 102 | chr12:25398283  | SNV | ACC            | ACC/ACA                      | ACC/ACC                                 | KRAS                                    | NM_033360.3    | missense    | TGTTGT   | 2   | p.Gly12Cys   | c.34G>T     |          |
| 103 | chr2:178098804  | SNV | C              | C/T                          | /                                       | NFE2L2                                  | NM_006164.4    | missense    | AGT      | 2   | p.Gly81Ser   | c.241G>A    |          |
| 104 | chr19:10610154  | SNV | C              | C/T                          | C/C                                     | KEAP1                                   | NM_203500.1    | missense    | AGC      | 2   | p.Gly186Ser  | c.556G>A    |          |
| 105 | chr19:1220644   | SNV | C              | C/T                          | C/C                                     | STK11                                   | NM_000455.4    | missense    | CTG      | 5   | p.Pro221Leu  | c.662C>T    |          |

|     |                 |       |                          |                                                  |                                                   |         |                |                           |     |    |                    |                                       |
|-----|-----------------|-------|--------------------------|--------------------------------------------------|---------------------------------------------------|---------|----------------|---------------------------|-----|----|--------------------|---------------------------------------|
| 106 | chr17:7578190   | SNV   | T                        | T/C                                              | T/T                                               | TP53    | NM_000546.5    | missense                  | TGT | 6  | p.Tyr220Cys        | c.659A>G                              |
| 107 | chr7:116412043  | SNV   | G                        | G/C                                              | G/G                                               | MET     | NM_001127500.1 | missense                  | GAT | 14 | p.Asp1028His       | c.3082G>C                             |
| 108 | chr16:2134691   | SNV   | G                        | G/C                                              | G/G                                               | TSC2    | NM_000548.3    | missense                  | CAG | 34 | p.Glu1490Gln       | c.4468G>C                             |
| 109 | chr15:42021449  | SNV   | G                        | G/A                                              | G/G                                               | MGA     | NM_001164273.1 | missense                  | AAG | 11 | p.Glu1249Lys       | c.3745G>A                             |
| 110 | chr9:21971149   | SNV   | G                        | G/C                                              | G/G                                               | CDKN2A  | NM_001195132.1 | missense                  | CGC | 2  | p.Pm70Arg          | c.209C>G                              |
| 111 | chr7:55242478   | SNV   | G                        | G/C                                              | G/G                                               | EGFR    | NM_005228.3    | missense                  | CCA | 19 | p.Ala750Pm         | c.2248G>C                             |
| 112 | chr2:178098810  | SNV   | C                        | C/G                                              | C/C                                               | NFE2L2  | NM_006164.4    | missense                  | CAG | 2  | p.Glu79Gln         | c.235G>C                              |
| 113 | chr17:7579406   | SNV   | G                        | G/C                                              | J.                                                | TP53    | NM_000546.5    | nonsense                  | TGA | 4  | p.Ser94Ter         | c.281C>G                              |
| 114 | chr17:7578254   | SNV   | C                        | C/A                                              | C/C                                               | TP53    | NM_000546.5    | nonsense                  | TGA | 6  | p.Gly199Ter        | c.595G>T                              |
| 115 | chr2:178098801  | SNV   | C                        | C/G                                              | C/C                                               | NFE2L2  | NM_006164.4    | missense                  | GAA | 2  | p.Glu82Gln         | c.244G>C                              |
| 116 | chr7:55242466   | INDEL | AGGAAT<br>TAAGAG<br>AAGC | AGGAATTA<br>AGAGAAG<br>C/AGGAAG<br>C             | AGGAATTA<br>AGAGAAG<br>C/AGGAAT<br>TAAGAGAA<br>GC | EGFR    | NM_005228.3    | nonframeshift<br>Deletion | -   | 19 | p.E746-R748<br>del | c.2239_2247<br>delTTAAGAG<br>AA       |
| 117 | chr7:140453179  | SNV   | C                        | C/T                                              | C/C                                               | BRAF    | NM_004333.4    | missense                  | AAA | 15 | p.Glu566Lys        | c.1756G>A                             |
| 118 | chr7:55259515   | SNV   | T                        | T/G                                              | T/T                                               | EGFR    | NM_005228.3    | missense                  | CGG | 21 | p.Leu658Arg        | c.2573T>G                             |
| 119 | chr2:178098944  | SNV   | C                        | C/A                                              | C/C                                               | NFE2L2  | NM_006164.4    | missense                  | GTA | 2  | p.Arg34Leu         | c.101G>T                              |
| 120 | chr17:7578518   | SNV   | C                        | C/G                                              | C/C                                               | TP53    | NM_000546.5    | missense                  | CCC | 5  | p.Ala138Pm         | c.412G>C                              |
| 121 | chr17:29664894  | SNV   | C                        | C/T                                              | C/C                                               | NF1     | NM_001042492.2 | nonsense                  | TAA | 44 | p.Gln2234Ter       | c.6700C>T                             |
| 122 | chr7:140481402  | SNV   | CC                       | CC/GC                                            | CC/CC                                             | BRAF    | NM_004333.4    | missense                  | GCA | 11 | p.Gly469Ala        | c.1406G>C                             |
| 123 | chr4:1805423    | SNV   | C                        | C/T                                              | C/C                                               | FGFR3   | NM_000142.4    | missense                  | GTG | 8  | p.Ala312Val        | c.935C>T                              |
| 124 | chr2:225370756  | SNV   | C                        | C/G                                              | C/C                                               | CUL3    | NM_003590.4    | missense                  | CAG | 8  | p.Glu375Gln        | c.1123G>C                             |
| 125 | chr17:7578469   | SNV   | CC                       | CC/AC                                            | CC/CC                                             | TP53    | NM_000546.5    | missense                  | GTC | 5  | p.Gly154Val        | c.461G>T                              |
| 126 | chr17:29533316  | SNV   | G                        | G/A                                              | G/G                                               | NF1     | NM_001042492.2 | missense                  | GAA | 12 | p.Arg440Gln        | c.1319G>A                             |
| 127 | chr19:1220629   | SNV   | C                        | C/T                                              | C/C                                               | STK11   | NM_000455.4    | missense                  | TTC | 5  | p.Ser216Phe        | c.647C>T                              |
| 128 | chr12:56489541  | SNV   | G                        | G/A                                              | G/G                                               | ERBB3   | NM_001982.3    | missense                  | CAC | 17 | p.Arg669His        | c.2006G>A                             |
| 129 | chr21:44524456  | SNV   | G                        | G/A                                              | G/G                                               | U2AF1   | NM_006758.2    | missense                  | TTT | 2  | p.Ser34Phe         | c.101C>T                              |
| 130 | chr19:11141534  | SNV   | G                        | G/A                                              | G/G                                               | SMARCA4 | NM_001128849.1 | missense                  | ATG | 25 | p.Val1171Met       | c.3511G>A                             |
| 131 | chr10:89720679  | SNV   | C                        | C/T                                              | J.                                                | PTEN    | NM_000314.4    | missense                  | ATA | 8  | p.Thr27Ile         | c.830C>T                              |
| 132 | chr2:178098957  | SNV   | G                        | G/A                                              | G/G                                               | NFE2L2  | NM_006164.4    | missense                  | TTT | 2  | p.Leu30Phe         | c.88C>T                               |
| 133 | chr1:120459031  | SNV   | C                        | C/T                                              | C/C                                               | NOTCH2  | NM_024408.3    | missense                  | CAG | 34 | p.Arg2105Gln       | c.6314G>A                             |
| 134 | chr7:114304421  | SNV   | C                        | C/T                                              | C/C                                               | FOXP2   | NM_148898.3    | missense                  | TTC | 17 | p.Leu670Phe        | c.2008C>T                             |
| 135 | chr19:1221976   | SNV   | G                        | G/T                                              | G/G                                               | STK11   | NM_000455.4    | missense                  | AGT | 7  | p.Arg297Ser        | c.891G>T                              |
| 136 | chr19:11143994  | SNV   | G                        | G/A                                              | G/G                                               | SMARCA4 | NM_001128849.1 | missense                  | CAC | 26 | p.Arg1192His       | c.3575G>A                             |
| 137 | chr3:41275779   | SNV   | G                        | G/T                                              | G/G                                               | CTNBN1  | NM_001904.3    | missense                  | CAT | 10 | p.Gln58His         | c.1674G>T                             |
| 138 | chr7:55242465   | INDEL | AGGAAT<br>TAAGAG<br>AAGC | AGGAATTA<br>AGAGAAG<br>C/A                       | AGGAATTA<br>AGAGAAG<br>C/AGGAAT<br>TAAGAGAA<br>GC | EGFR    | NM_005228.3    | nonframeshift<br>Deletion | -   | 19 | p.E746-A750<br>del | c.2235_2249<br>delGGAATTA<br>AGAGAAGC |
| 139 | chr22:41560092  | SNV   | A                        | A/T                                              | A/A                                               | EP300   | NM_001429.3    | missense                  | CTT | 22 | p.His1255Leu       | c.3764A>T                             |
| 140 | chr18:48604750  | SNV   | G                        | G/T                                              | G/G                                               | SMAD4   | NM_005359.5    | missense                  | TGT | 12 | p.Trp524Cys        | c.1572G>T                             |
| 141 | chr17:7574017   | SNV   | C                        | C/A                                              | C/C                                               | TP53    | NM_000546.5    | missense                  | CTC | 10 | p.Arg337Leu        | c.1010G>T                             |
| 142 | chr3:178927980  | SNV   | T                        | T/C                                              | J.                                                | PIK3CA  | NM_006218.2    | missense                  | CGT | 8  | p.Cys420Arg        | c.1258T>C                             |
| 143 | chr17:37880988  | SNV   | G                        | G/A                                              | G/G                                               | ERBB2   | NM_004448.3    | missense                  | ATG | 20 | p.Val773Met        | c.2317G>A                             |
| 144 | chr3:178952085  | SNV   | A                        | A/T                                              | A/A                                               | PIK3CA  | NM_006218.2    | missense                  | CTT | 21 | p.His1047Leu       | c.3140A>T                             |
| 145 | chr9:135771989  | SNV   | C                        | C/T                                              | C/C                                               | TSC1    | NM_000368.4    | missense                  | AAC | 23 | p.Ser1043Asn       | c.3128G>A                             |
| 146 | chr17:7577528   | SNV   | GATGGG<br>CCTCCG<br>GTTT | GATGGGC<br>CTCCGGT<br>C/GATGGG<br>CCTCAGGT<br>TC | GATGGGC<br>CTCCGGT<br>C/GATGGG<br>CCTCCGGT<br>TC  | TP53    | NM_000546.5    | missense                  | CTG | 7  | p.Arg248Leu        | c.743G>T                              |
| 147 | chr19:10600447  | SNV   | G                        | G/A                                              | G/G                                               | KEAP1   | NM_203500.1    | missense                  | TGT | 4  | p.Arg470Cys        | c.1408C>T                             |
| 148 | chr3:178936082  | SNV   | G                        | G/A                                              | G/G                                               | PIK3CA  | NM_006218.3    | missense                  | AAA | 10 | p.Glu542Lys        | c.1624G>A                             |
| 149 | chr18:48584814  | SNV   | C                        | C/T                                              | C/C                                               | SMAD4   | NM_005359.5    | missense                  | TCC | 7  | p.Pm298Ser         | c.892C>T                              |
| 150 | chr15:41991122  | SNV   | C                        | C/G                                              | C/C                                               | MGA     | NM_001164273.1 | nonsense                  | TGA | 4  | p.Ser692Ter        | c.2075C>G                             |
| 151 | chr11:108143315 | SNV   | G                        | G/A                                              | G/G                                               | ATM     | NM_000051.3    | missense                  | TAC | 21 | p.Cys1045Tyr       | c.3134G>A                             |
| 152 | chr9:139405140  | SNV   | C                        | C/T                                              | C/C                                               | NOTCH1  | NM_017617.4    | missense                  | CAC | 17 | p.Arg902His        | c.2705G>A                             |
| 153 | chr2:225379486  | SNV   | G                        | G/A                                              | G/G                                               | CUL3    | NM_003590.4    | missense                  | TGT | 4  | p.Arg128Cys        | c.382C>T                              |
| 154 | chr16:3781375   | SNV   | G                        | G/A                                              | G/G                                               | CREBBP  | NM_004380.2    | missense                  | TGC | 30 | p.Arg1664Cys       | c.4990C>T                             |
| 155 | chr1:243828144  | SNV   | A                        | A/C                                              | A/A                                               | AKT3    | NM_005465.4    | missense                  | GTT | 3  | p.Phe72Val         | c.214T>G                              |
| 156 | chr12:56495034  | SNV   | G                        | G/A                                              | G/G                                               | ERBB3   | NM_001982.3    | missense                  | ACC | 27 | p.Ala1131Thr       | c.3391G>A                             |
| 157 | chr9:21971179   | SNV   | G                        | G/A                                              | G/G                                               | CDKN2A  | NM_001195132.1 | missense                  | GTG | 2  | p.Ala60Val         | c.179C>T                              |
| 158 | chr1:27105920   | SNV   | G                        | G/A                                              | G/G                                               | ARID1A  | NM_006015.4    | nonsense                  | TAG | 20 | p.Trp1844Ter       | c.5531G>A                             |
| 159 | chr10:89692792  | SNV   | C                        | C/A                                              | C/C                                               | PTEN    | NM_000314.6    | missense                  | GAA | 5  | p.Asp92Glu         | c.276C>A                              |
| 160 | chr19:10602748  | SNV   | G                        | G/A                                              | G/G                                               | KEAP1   | NM_203500.1    | missense                  | ATG | 3  | p.Thr277Met        | c.830C>T                              |

|     |                 |     |                                              |                                                                                       |                                                                                       |         |                   |          |     |    |              |           |
|-----|-----------------|-----|----------------------------------------------|---------------------------------------------------------------------------------------|---------------------------------------------------------------------------------------|---------|-------------------|----------|-----|----|--------------|-----------|
| 161 | chr17:7577094   | SNV | GGTCTC<br>T                                  | GGTCTCT/<br>CGTCTCT                                                                   | GGTCTCT/<br>GGTCTCT                                                                   | TP53    | NM_000546.5       | missense | GGG | 8  | p.Arg282Gly  | c.844C>G  |
| 162 | chr9:139391715  | SNV | C                                            | C/T                                                                                   | C/C                                                                                   | NOTCH1  | NM_017617.4       | missense | CAC | 34 | p.Arg2159His | c.6476G>A |
| 163 | chr16:3788617   | SNV | C                                            | C/T                                                                                   | C/C                                                                                   | CREBBP  | NM_004380.2       | missense | CAC | 26 | p.Arg1446His | c.4337G>A |
| 164 | chr3:178922340  | SNV | A                                            | A/G                                                                                   | A/A                                                                                   | PIK3CA  | NM_006218.2       | missense | AGT | 6  | p.Asn370Ser  | c.1109A>G |
| 165 | chr12:25380283  | SNV | C                                            | C/T                                                                                   | C/C                                                                                   | KRAS    | NM_033360.3       | missense | ACA | 3  | p.Ala59Ihr   | c.175G>A  |
| 166 | chr12:46244889  | SNV | C                                            | C/T                                                                                   | C/C                                                                                   | ARID2   | NM_152641.2       | nonsense | TAA | 15 | p.Gln995Ter  | c.2983C>T |
| 167 | chr22:41531892  | SNV | C                                            | C/T                                                                                   | C/C                                                                                   | EP300   | NM_001429.3       | missense | TTA | 7  | p.Ser533Leu  | c.1604C>T |
| 168 | chr6:93967895   | SNV | C                                            | C/T                                                                                   | C/C                                                                                   | EPHA7   | NM_004440.3       | missense | AAC | 11 | p.Asp678Asn  | c.2032G>A |
| 169 | chr12:49446160  | SNV | C                                            | C/T                                                                                   | C/C                                                                                   | KMT2D   | NM_003482.3       | missense | AAG | 10 | p.Glu436Lys  | c.1306G>A |
| 170 | chr5:86672800   | SNV | G                                            | G/A                                                                                   | G/G                                                                                   | RASA1   | NM_002890.2       | missense | AAA | 17 | p.Glu763Lys  | c.2287G>A |
| 171 | chr5:86686658   | SNV | A                                            | A/C                                                                                   | A/A                                                                                   | RASA1   | NM_002890.2       | missense | CAC | 25 | p.Gln1034His | c.3102A>C |
| 172 | chr12:46243449  | SNV | G                                            | G/A                                                                                   | G/G                                                                                   | ARID2   | NM_152641.2       | missense | CAG | 14 | p.Arg601Gln  | c.1802G>A |
| 173 | chr11:108098524 | SNV | C                                            | C/T                                                                                   | C/C                                                                                   | ATM     | NM_000051.3       | missense | TGC | 3  | p.Arg32Cys   | c.94C>T   |
| 174 | chr3:178952074  | SNV | G                                            | G/A                                                                                   | G/G                                                                                   | PIK3CA  | NM_006218.2       | missense | ATA | 21 | p.Met1043Ile | c.3129G>A |
| 175 | chr9:21971017   | SNV | G                                            | G/A                                                                                   | G/G                                                                                   | CDKN2A  | NM_000077.4       | missense | CTC | 2  | p.Pro114Leu  | c.341C>T  |
| 176 | chr17:29553550  | SNV | C                                            | C/G                                                                                   | C/C                                                                                   | NF1     | NM_001042492<br>2 | missense | AGT | 18 | p.Thr700Ser  | c.2090C>G |
| 177 | chr11:108205780 | SNV | C                                            | C/T                                                                                   | C/C                                                                                   | ATM     | NM_000051.3       | missense | TCA | 55 | p.Pro2699Ser | c.8095C>T |
| 178 | chr19:11141519  | SNV | C                                            | C/T                                                                                   | C/C                                                                                   | SMARCA4 | NM_001128849<br>1 | nonsense | TAG | 25 | p.Gln1166Ter | c.3496G>T |
| 179 | chr12:56490604  | SNV | C                                            | C/T                                                                                   | C/C                                                                                   | ERBB3   | NM_001982.3       | missense | TGG | 19 | p.Arg750Trp  | c.2248C>T |
| 180 | chr9:139412673  | SNV | G                                            | G/A                                                                                   | /                                                                                     | NOTCH1  | NM_017617.3       | missense | TCT | 7  | p.Pro391Ser  | c.1171C>T |
| 181 | chr7:140453136  | SNV | A                                            | A/T                                                                                   | A/A                                                                                   | BRAF    | NM_004333.4       | missense | GAG | 15 | p.Val600Glu  | c.1799T>A |
| 182 | chr7:140453133  | SNV | TTCAC                                        | TTCAC/TTC<br>AA                                                                       | TTCAC/TTC<br>AC                                                                       | BRAF    | NM_004333.4       | missense | TTG | 15 | p.Val600Leu  | c.1798G>T |
| 183 | chr19:1220410   | SNV | A                                            | A/G                                                                                   | A/A                                                                                   | STK11   | NM_000455.4       | missense | CGT | 4  | p.His168Arg  | c.503A>G  |
| 184 | chr12:46246113  | SNV | C                                            | C/T                                                                                   | C/C                                                                                   | ARID2   | NM_152641.2       | nonsense | TAG | 15 | p.Gln1403Ter | c.4207C>T |
| 185 | chr12:46211461  | SNV | C                                            | C/T                                                                                   | C/C                                                                                   | ARID2   | NM_152641.2       | missense | TGT | 5  | p.Arg143Cys  | c.427C>T  |
| 186 | chr3:47158132   | SNV | G                                            | G/A                                                                                   | G/G                                                                                   | SETD2   | NM_014159.6       | missense | TGT | 4  | p.Arg1523Cys | c.4567C>T |
| 187 | chr3:41266113   | SNV | C                                            | C/T                                                                                   | C/C                                                                                   | CTNNB1  | NM_001904.3       | missense | TTT | 3  | p.Ser37Phe   | c.110C>T  |
| 188 | chr17:7578415   | SNV | AC                                           | AC/AA                                                                                 | AC/AC                                                                                 | TP53    | NM_000546.5       | missense | TTT | 5  | p.Val172Phe  | c.514G>T  |
| 189 | chr19:1221313   | SNV | GCCCCC<br>C                                  | GCCCCC/<br>GCCCCCT                                                                    | GCCCCC/<br>GCCCCCC                                                                    | STK11   | NM_000455.4       | missense | CTG | 6  | p.Pro281Leu  | c.842C>T  |
| 190 | chr19:11141523  | SNV | C                                            | C/T                                                                                   | C/C                                                                                   | SMARCA4 | NM_001128849<br>1 | missense | TTG | 25 | p.Ser1167Leu | c.3500C>T |
| 191 | chr18:48591915  | SNV | G                                            | G/T                                                                                   | G/G                                                                                   | SMAD4   | NM_005359.5       | missense | TAT | 9  | p.Asp360Tyr  | c.1078G>T |
| 192 | chr2:178098799  | SNV | T                                            | T/A                                                                                   | /                                                                                     | NFE2L2  | NM_006164.4       | missense | GAT | 2  | p.Glu82Asp   | c.246A>T  |
| 193 | chr9:21974732   | SNV | A                                            | A/G                                                                                   | A/A                                                                                   | CDKN2A  | NM_000077.4       | missense | CCG | 1  | p.Leu32Pro   | c.95T>C   |
| 194 | chr17:37881006  | SNV | T                                            | T/C                                                                                   | T/T                                                                                   | ERBB2   | NM_004448.3       | missense | CCC | 20 | p.Ser779Pro  | c.2335T>C |
| 195 | chr4:1807841    | SNV | G                                            | G/A                                                                                   | G/G                                                                                   | FGFR3   | NM_000142.4       | missense | ACA | 14 | p.Ala634Ihr  | c.1900G>A |
| 196 | chr3:47125794   | SNV | G                                            | G/A                                                                                   | G/G                                                                                   | SETD2   | NM_014159.6       | missense | TGC | 12 | p.Arg1826Cys | c.5476G>T |
| 197 | chr6:93956510   | SNV | C                                            | C/T                                                                                   | C/C                                                                                   | EPHA7   | NM_004440.3       | missense | AAG | 15 | p.Arg909Lys  | c.2726G>A |
| 198 | chr19:40748476  | SNV | T                                            | T/C                                                                                   | /                                                                                     | AKT2    | NM_001626.5       | missense | GTG | 5  | p.Met1136Val | c.406A>G  |
| 199 | chr10:89725099  | SNV | G                                            | G/A                                                                                   | G/G                                                                                   | PTEN    | NM_000314.6       | missense | AAT | 9  | p.Ser361Asn  | c.1082G>A |
| 200 | chr4:20619271   | SNV | G                                            | G/A                                                                                   | G/G                                                                                   | SLIT2   | NM_004787.3       | missense | CAA | 36 | p.Arg1449Gln | c.4346G>A |
| 201 | chr17:7578256   | SNV | TCCACT<br>CGGATA<br>AGATGC<br>TGAGGA<br>GGGG | TCCACTCG<br>GATAAGAT<br>GCTGAGG<br>AGGGG/TG<br>CACTCGGA<br>TACGATGC<br>TGAGGAG<br>GGG | TCCACTCG<br>GATAAGAT<br>GCTGAGG<br>AGGGG/TG<br>CACTCGGA<br>TAAGATGC<br>TGAGGAG<br>GGG | TP53    | NM_000546.5       | missense | CGT | 6  | p.Leu194Arg  | c.581T>G  |
| 202 | chr16:3779773   | SNV | G                                            | G/T                                                                                   | G/G                                                                                   | CREBBP  | NM_004380.2       | missense | ACA | 31 | p.Pro1759Thr | c.5275C>A |
| 203 | chr19:11098396  | SNV | C                                            | C/T                                                                                   | C/C                                                                                   | SMARCA4 | NM_001128849<br>1 | missense | CTG | 6  | p.Pro305Leu  | c.914C>T  |
| 204 | chr12:25398314  | SNV | G                                            | G/A                                                                                   | G/G                                                                                   | KRAS    | NM_033360.3       | missense | ATT | 2  | p.Thr2Ile    | c.5C>T    |
| 205 | chr2:225342966  | SNV | C                                            | C/T                                                                                   | C/C                                                                                   | CUL3    | NM_003590.4       | missense | CAG | 15 | p.Arg709Gln  | c.2126G>A |
| 206 | chr1:27106703   | SNV | C                                            | C/T                                                                                   | C/C                                                                                   | ARID1A  | NM_006015.4       | missense | ATC | 20 | p.Thr2105Ile | c.6314C>T |
| 207 | chr7:51098538   | SNV | G                                            | G/C                                                                                   | G/G                                                                                   | COBL    | NM_015198.3       | missense | AGC | 9  | p.Thr492Ser  | c.1475C>G |
| 208 | chr19:40741860  | SNV | C                                            | C/T                                                                                   | C/C                                                                                   | AKT2    | NM_001626.5       | missense | CAC | 11 | p.Arg371His  | c.1112G>A |
| 209 | chr3:47161976   | SNV | T                                            | T/C                                                                                   | T/T                                                                                   | SETD2   | NM_014159.6       | missense | GAT | 3  | p.Asn1384Asp | c.4150A>G |
| 210 | chr3:178938934  | SNV | G                                            | G/A                                                                                   | G/G                                                                                   | PIK3CA  | NM_006218.2       | missense | AAA | 14 | p.Glu726Lys  | c.2176G>A |
| 211 | chr19:10610423  | SNV | T                                            | T/C                                                                                   | T/T                                                                                   | KEAP1   | NM_203500.1       | missense | CGC | 2  | p.His96Arg   | c.287A>G  |
| 212 | chr9:139418229  | SNV | C                                            | C/T                                                                                   | C/C                                                                                   | NOTCH1  | NM_017617.3       | missense | AGC | 3  | p.Gly115Ser  | c.343G>A  |
| 213 | chr12:25378562  | SNV | C                                            | C/T                                                                                   | C/C                                                                                   | KRAS    | NM_033360.3       | missense | ACA | 4  | p.Ala146Thr  | c.436G>A  |
| 214 | chr7:55233052   | SNV | G                                            | G/A                                                                                   | G/G                                                                                   | EGFR    | NM_005228.3       | missense | GAA | 15 | p.Gly601Glu  | c.1802G>A |
| 215 | chr15:42028520  | SNV | G                                            | G/A                                                                                   | G/G                                                                                   | MGA     | NM_001164273<br>1 | missense | AAC | 13 | p.Ser1353Asn | c.4058G>A |



|     |                 |     |                                                                        |                                                                                                                                  |                                                                                                                                  |         |                |          |     |    |              |           |
|-----|-----------------|-----|------------------------------------------------------------------------|----------------------------------------------------------------------------------------------------------------------------------|----------------------------------------------------------------------------------------------------------------------------------|---------|----------------|----------|-----|----|--------------|-----------|
| 216 | chr11:108186775 | SNV | G                                                                      | G/A                                                                                                                              | G/G                                                                                                                              | ATM     | NM_000051.3    | missense | ACC | 42 | p.Ala2045Thr | c.6133G>A |
| 217 | chr7:114299725  | SNV | G                                                                      | G/A                                                                                                                              | G/G                                                                                                                              | FOXP2   | NM_148898.3    | nonsense | TGA | 14 | p.Trp573Ter  | c.1719G>A |
| 218 | chr17:29588851  | SNV | C                                                                      | C/G                                                                                                                              | C/C                                                                                                                              | NF1     | NM_001042492.2 | nonsense | TGA | 35 | p.Ser1567Ter | c.4700C>G |
| 219 | chr9:139399799  | SNV | C                                                                      | C/T                                                                                                                              | C/C                                                                                                                              | NOTCH1  | NM_017617.4    | missense | AAC | 25 | p.Asp1517Asn | c.4549G>A |
| 220 | chr9:139390656  | SNV | G                                                                      | G/A                                                                                                                              | G/G                                                                                                                              | NOTCH1  | NM_017617.3    | missense | CTG | 34 | p.Pro2512Leu | c.7535C>T |
| 221 | chr7:116415114  | SNV | G                                                                      | G/A                                                                                                                              | G/G                                                                                                                              | MET     | NM_001127500.2 | missense | ATG | 15 | p.Val1068Met | c.3262G>A |
| 222 | chr12:108169333 | SNV | C                                                                      | C/T                                                                                                                              | C/C                                                                                                                              | ASCL4   | NM_203436.2    | missense | ATG | 1  | p.Thr114Met  | c.341C>T  |
| 223 | chr15:42035146  | SNV | C                                                                      | C/T                                                                                                                              | C/C                                                                                                                              | MGA     | NM_001164273.1 | missense | ATC | 15 | p.Thr1663Ile | c.4988C>T |
| 224 | chr22:41536175  | SNV | G                                                                      | G/A                                                                                                                              | G/G                                                                                                                              | EP300   | NM_0011429.3   | missense | ACT | 9  | p.Ala598Ihr  | c.1792G>A |
| 225 | chr15:41961399  | SNV | C                                                                      | C/T                                                                                                                              | C/C                                                                                                                              | MGA     | NM_001164273.1 | missense | TGC | 2  | p.Arg103Cys  | c.307C>T  |
| 226 | chr12:25398280  | SNV | GCCACC                                                                 | GCCACC/GCCACC                                                                                                                    | GCCACC/GCCACC                                                                                                                    | KRAS    | NM_033360.3    | missense | CGT | 2  | p.Gly12Arg   | c.34G>C   |
| 227 | chr1:27023954   | SNV | C                                                                      | C/T                                                                                                                              | C/C                                                                                                                              | ARID1A  | NM_006015.4    | nonsense | TAA | 1  | p.Gln354Ter  | c.1060C>T |
| 228 | chr17:7578492   | SNV | C                                                                      | C/T                                                                                                                              | C/C                                                                                                                              | TP53    | NM_000546.5    | nonsense | TGA | 5  | p.Trp146Ter  | c.438G>A  |
| 229 | chr9:135772900  | SNV | C                                                                      | C/T                                                                                                                              | C/C                                                                                                                              | TSC1    | NM_000368.4    | missense | CAG | 21 | p.Arg908Gln  | c.2723G>A |
| 230 | chr10:89692811  | SNV | G                                                                      | G/T                                                                                                                              | G/G                                                                                                                              | PTEN    | NM_000314.4    | nonsense | TAA | 5  | p.Glu99Ter   | c.295G>T  |
| 231 | chr17:7579377   | SNV | G                                                                      | G/A                                                                                                                              | J                                                                                                                                | TP53    | NM_000546.5    | nonsense | TAG | 4  | p.Gln104Ter  | c.310C>T  |
| 232 | chr4:1808949    | SNV | TGCCCC<br>CGGCC<br>CACCCA<br>GCAGTG<br>GGGGCT<br>CGCGGA<br>CGTGAA<br>G | TGCCCCG<br>GCCCAGC<br>CAGCAGT<br>GGGGGCT<br>CGCGGAC<br>GTGAAG/T<br>GCCCCG<br>GCCCCACC<br>CAGCAGT<br>GGGGACT<br>CGCGGAC<br>GTGAAG | TGCCCCG<br>GCCCAGC<br>CAGCAGT<br>GGGGGCT<br>CGCGGAC<br>GTGAAG/T<br>GCCCCG<br>GCCCCACC<br>CAGCAGT<br>GGGGGCT<br>CGCGGAC<br>GTGAAG | FGFR3   | NM_001163213.1 | missense | GAC | 18 | p.Gly805Asp  | c.2414G>A |
| 233 | chr7:140454006  | SNV | G                                                                      | G/T                                                                                                                              | G/G                                                                                                                              | BRAF    | NM_004333.4    | missense | CAA | 14 | p.His74Gln   | c.1722C>A |
| 234 | chr15:42002945  | SNV | G                                                                      | G/C                                                                                                                              | G/G                                                                                                                              | MGA     | NM_001164273.1 | missense | CAT | 8  | p.Asp828His  | c.2482G>C |
| 235 | chr10:89711935  | SNV | C                                                                      | C/T                                                                                                                              | C/C                                                                                                                              | PTEN    | NM_000314.6    | missense | TAT | 6  | p.His185Tyr  | c.553C>T  |
| 236 | chr5:86633834   | SNV | G                                                                      | G/A                                                                                                                              | J                                                                                                                                | RASA1   | NM_002890.2    | missense | AAT | 5  | p.Asp315Asn  | c.943G>A  |
| 237 | chr6:94068121   | SNV | G                                                                      | G/A                                                                                                                              | G/G                                                                                                                              | EPHA7   | NM_004440.3    | missense | TGT | 4  | p.Arg281Cys  | c.841C>T  |
| 238 | chr1:120465007  | SNV | T                                                                      | T/A                                                                                                                              | T/T                                                                                                                              | NOTCH2  | NM_024408.3    | missense | TTT | 28 | p.Ile1689Phe | c.5065A>T |
| 239 | chr2:225362480  | SNV | G                                                                      | G/A                                                                                                                              | G/G                                                                                                                              | CUL3    | NM_003590.4    | missense | CTA | 12 | p.Pro566Leu  | c.1697G>T |
| 240 | chr6:93982075   | SNV | G                                                                      | G/A                                                                                                                              | G/G                                                                                                                              | EPHA7   | NM_004440.3    | nonsense | TAG | 6  | p.Gln464Ter  | c.1390C>T |
| 241 | chr12:49445568  | SNV | G                                                                      | G/A                                                                                                                              | G/G                                                                                                                              | KMT2D   | NM_003482.3    | missense | TTG | 10 | p.Ser633Leu  | c.1898C>T |
| 242 | chr17:7577070   | SNV | GGAGAT<br>TCCTTC<br>CTCTGT<br>GC                                       | GGAGATTC<br>TCTTCCTC<br>TGTGC/GG<br>AGATTCTC<br>TTCTTTG<br>TGC                                                                   | GGAGATTC<br>TCCTTCCTC<br>TGTGC/GG<br>AGATTCTC<br>TTCTTCG<br>TGC                                                                  | TP53    | NM_000546.5    | missense | AAG | 8  | p.Glu285Lys  | c.853G>A  |
| 243 | chr7:51261249   | SNV | G                                                                      | G/A                                                                                                                              | J                                                                                                                                | COBL    | NM_015198.3    | nonsense | TAG | 3  | p.Gln95Ter   | c.283C>T  |
| 244 | chr19:11097617  | SNV | C                                                                      | C/T                                                                                                                              | C/C                                                                                                                              | SMARCA4 | NM_001128849.1 | missense | TTG | 5  | p.Ser266Leu  | c.797C>T  |
| 245 | chr1:24368559   | SNV | G                                                                      | G/A                                                                                                                              | G/G                                                                                                                              | AKT3    | NM_005465.4    | nonsense | TGA | 13 | p.Arg478Ter  | c.1432C>T |
| 246 | chr22:41533715  | SNV | C                                                                      | C/T                                                                                                                              | C/C                                                                                                                              | EP300   | NM_0011429.3   | nonsense | TAA | 8  | p.Gln561Ter  | c.1681C>T |
| 247 | chr17:29587407  | SNV | C                                                                      | C/T                                                                                                                              | C/C                                                                                                                              | NF1     | NM_001042492.2 | missense | TTT | 34 | p.Ser1484Phe | c.4451C>T |
| 248 | chr12:46246056  | SNV | C                                                                      | C/T                                                                                                                              | C/C                                                                                                                              | ARID2   | NM_152641.2    | missense | TAT | 15 | p.His1384Tyr | c.4150C>T |
| 249 | chr16:3828769   | SNV | G                                                                      | G/A                                                                                                                              | J                                                                                                                                | CREBBP  | NM_004380.2    | missense | TGC | 9  | p.Arg625Cys  | c.1873C>T |
| 250 | chr17:7577506   | SNV | C                                                                      | C/A                                                                                                                              | C/C                                                                                                                              | TP53    | NM_000546.5    | missense | TAC | 7  | p.Asp259Tyr  | c.775G>T  |
| 251 | chr1:120471614  | SNV | G                                                                      | G/A                                                                                                                              | G/G                                                                                                                              | NOTCH2  | NM_024408.3    | missense | TGT | 23 | p.Arg1293Cys | c.3877C>T |
| 252 | chr3:178947844  | SNV | G                                                                      | G/A                                                                                                                              | G/G                                                                                                                              | PIK3CA  | NM_006218.3    | missense | ACT | 19 | p.Ala907Ihr  | c.2719G>A |
| 253 | chr4:1808865    | SNV | C                                                                      | C/T                                                                                                                              | C/C                                                                                                                              | FGFR3   | NM_000142.4    | missense | CTT | 18 | p.Pro766Leu  | c.2297G>T |
| 254 | chr10:89692901  | SNV | G                                                                      | G/A                                                                                                                              | G/G                                                                                                                              | PTEN    | NM_000314.6    | missense | AGA | 5  | p.Gly129Arg  | c.385G>A  |
| 255 | chr16:3779094   | SNV | C                                                                      | C/T                                                                                                                              | C/C                                                                                                                              | CREBBP  | NM_004380.2    | missense | CAC | 31 | p.Arg1985His | c.5954G>A |
| 256 | chr13:48951168  | SNV | C                                                                      | C/T                                                                                                                              | C/C                                                                                                                              | RB1     | NM_000321.2    | nonsense | TAG | 13 | p.Gln444Ter  | c.1330C>T |
| 257 | chr21:44513298  | SNV | C                                                                      | C/T                                                                                                                              | C/C                                                                                                                              | U2AF1   | NM_006758.2    | missense | AGT | 8  | p.Gly213Ser  | c.637G>A  |
| 258 | chr12:49433620  | SNV | G                                                                      | G/A                                                                                                                              | G/G                                                                                                                              | KMT2D   | NM_003482.3    | nonsense | TGA | 31 | p.Arg2645Ter | c.7933C>T |
| 259 | chr16:2115545   | SNV | C                                                                      | C/T                                                                                                                              | C/C                                                                                                                              | TSC2    | NM_000548.3    | missense | CTC | 16 | p.Pro542Leu  | c.1625C>T |

|     |                 |     |                                                                           |                                                                                                                                                 |                                                                                                                                               |         |                   |          |     |    |              |           |
|-----|-----------------|-----|---------------------------------------------------------------------------|-------------------------------------------------------------------------------------------------------------------------------------------------|-----------------------------------------------------------------------------------------------------------------------------------------------|---------|-------------------|----------|-----|----|--------------|-----------|
| 260 | chr3:41266064   | SNV | GCTGTT<br>AGTCAC<br>TGCCAG<br>CAACAG<br>CTTAC<br>CTGGAC<br>T              | GCTGTTAG<br>TCACTGGC<br>AGCAACA<br>GCTTACC<br>TGGACT/G<br>CTGTAGT<br>CACTGGCA<br>GCAACAGT<br>CTTACCTG<br>GGCT                                   | GCTGTTAG<br>TCACTGGC<br>AGCAACA<br>GCTTACC<br>TGGACT/G<br>CTGTAGT<br>CACTGGCA<br>GCAACAGT<br>CTTACCTG<br>GACT                                 | CTNNB1  | NM_001904.3       | missense | GGC | 3  | p.Asp32Gly   | c.95A>G   |
| 261 | chr3:178917544  | SNV | G                                                                         | G/A                                                                                                                                             | G/G                                                                                                                                           | PIK3CA  | NM_006218.3       | missense | CAA | 3  | p.Arg140Gln  | c.419G>A  |
| 262 | chr22:41574655  | SNV | C                                                                         | C/A                                                                                                                                             | /                                                                                                                                             | EP300   | NM_001429.3       | missense | ACT | 31 | p.Pro2314Thr | c.6940C>A |
| 263 | chr16:2136741   | SNV | C                                                                         | C/T                                                                                                                                             | C/C                                                                                                                                           | TSC2    | NM_000548.4       | missense | TAC | 38 | p.His1620Tyr | c.4858C>T |
| 264 | chr17:29509657  | SNV | G                                                                         | G/A                                                                                                                                             | G/G                                                                                                                                           | NF1     | NM_001042492<br>2 | missense | ATG | 8  | p.Val288Met  | c.862G>A  |
| 265 | chr7:55259427   | SNV | G                                                                         | G/A                                                                                                                                             | G/G                                                                                                                                           | EGFR    | NM_005228.3       | missense | AAG | 21 | p.Glu829Lys  | c.2485G>A |
| 266 | chr12:46244334  | SNV | G                                                                         | G/C                                                                                                                                             | G/G                                                                                                                                           | ARID2   | NM_152641.2       | missense | CCA | 15 | p.Ala810Pro  | c.2428G>C |
| 267 | chr12:49447881  | SNV | G                                                                         | G/A                                                                                                                                             | G/G                                                                                                                                           | KMT2D   | NM_003482.3       | missense | TGC | 5  | p.Arg185Cys  | c.553C>T  |
| 268 | chr16:3827632   | SNV | G                                                                         | G/A                                                                                                                                             | G/G                                                                                                                                           | CREBBP  | NM_004380.2       | missense | TGC | 11 | p.Arg714Cys  | c.2140C>T |
| 269 | chr19:11129641  | SNV | C                                                                         | C/T                                                                                                                                             | C/C                                                                                                                                           | SMARCA4 | NM_001128849<br>1 | missense | TTC | 17 | p.Ser616Phe  | c.2447C>T |
| 270 | chr17:29556200  | SNV | G                                                                         | G/A                                                                                                                                             | /                                                                                                                                             | NF1     | NM_001042492<br>2 | missense | AAC | 21 | p.Ser856Asn  | c.2567G>A |
| 271 | chr17:7578181   | SNV | G                                                                         | G/A                                                                                                                                             | G/G                                                                                                                                           | TP53    | NM_000546.5       | missense | CTT | 6  | p.Pro223Leu  | c.668C>T  |
| 272 | chr3:178928109  | SNV | G                                                                         | G/A                                                                                                                                             | G/G                                                                                                                                           | PIK3CA  | NM_006218.2       | missense | AGA | 8  | p.Gly463Arg  | c.1387G>A |
| 273 | chr17:29664858  | SNV | A                                                                         | A/G                                                                                                                                             | A/A                                                                                                                                           | NF1     | NM_001042492<br>2 | missense | GCG | 44 | p.Thr222Ala  | c.6664A>G |
| 274 | chr3:41280636   | SNV | C                                                                         | C/T                                                                                                                                             | C/C                                                                                                                                           | CTNNB1  | NM_001904.3       | missense | TGT | 15 | p.Arg717Cys  | c.2149C>T |
| 275 | chr14:105239875 | SNV | G                                                                         | G/A                                                                                                                                             | G/G                                                                                                                                           | AKT1    | NM_001014431<br>1 | missense | TGG | 9  | p.Arg249Trp  | c.745C>T  |
| 276 | chr4:20525665   | SNV | G                                                                         | G/A                                                                                                                                             | G/G                                                                                                                                           | SLIT2   | NM_004787.3       | missense | AAC | 14 | p.Asp435Asn  | c.1303G>A |
| 277 | chr11:108151894 | SNV | A                                                                         | A/G                                                                                                                                             | A/A                                                                                                                                           | ATM     | NM_000051.3       | missense | AGG | 24 | p.Lys1192Arg | c.3575A>G |
| 278 | chr17:37872806  | SNV | C                                                                         | C/T                                                                                                                                             | C/C                                                                                                                                           | ERBB2   | NM_004448.3       | missense | CTG | 14 | p.Pro562Leu  | c.1685C>T |
| 279 | chr18:48581285  | SNV | A                                                                         | A/G                                                                                                                                             | A/A                                                                                                                                           | SMAD4   | NM_005359.5       | missense | GCC | 5  | p.Thr197Ala  | c.589A>G  |
| 280 | chr11:108205768 | SNV | G                                                                         | G/A                                                                                                                                             | G/G                                                                                                                                           | ATM     | NM_000051.3       | missense | AGT | 55 | p.Gly2695Ser | c.8083G>A |
| 281 | chrX:47040962   | SNV | C                                                                         | C/T                                                                                                                                             | C/C                                                                                                                                           | RBM10   | NM_001204468<br>1 | missense | TGC | 14 | p.Arg563Cys  | c.1687C>T |
| 282 | chr7:55241708   | SNV | G                                                                         | G/C                                                                                                                                             | G/G                                                                                                                                           | EGFR    | NM_005228.3       | missense | GCC | 18 | p.Gly719Ala  | c.2156G>C |
| 283 | chr9:139410075  | SNV | G                                                                         | G/A                                                                                                                                             | G/G                                                                                                                                           | NOTCH1  | NM_017617.3       | missense | ATC | 11 | p.Thr581Ile  | c.1763C>T |
| 284 | chr1:120458381  | SNV | G                                                                         | G/A                                                                                                                                             | G/G                                                                                                                                           | NOTCH2  | NM_024408.3       | missense | TCC | 34 | p.Pro2322Ser | c.6964C>T |
| 285 | chr12:49438030  | SNV | G                                                                         | G/A                                                                                                                                             | G/G                                                                                                                                           | KMT2D   | NM_003482.3       | missense | CTT | 21 | p.Pro1714Leu | c.5141C>T |
| 286 | chr22:41574664  | SNV | C                                                                         | C/T                                                                                                                                             | C/C                                                                                                                                           | EP300   | NM_001429.3       | missense | TGG | 31 | p.Arg2317Trp | c.6949C>T |
| 287 | chr17:7579416   | SNV | AGGAG<br>GGGCT<br>GGTGCA<br>GGGCG<br>CCCCGG<br>TGTAGG<br>AGCTGC<br>TGGTGC | AGGAGGG<br>GGCTGGT<br>GCAGGGG<br>CCGCCGG<br>TG IAGGA<br>GCTGCTG<br>GTGC/AGG<br>AGGGGGC<br>IAGTGCCAG<br>GGGCCCG<br>CCGTGTA<br>GGAGCTG<br>CTGGTGC | AGGAGGG<br>GGCTGGT<br>GCAGGGG<br>CCGCCGG<br>IG IAGGA<br>GCTGCTG<br>GTGC/AGG<br>AGGGGGC<br>TGGTGCA<br>GGGCCCG<br>CCGTGTA<br>GGAGCTG<br>CTGGTGC | TP53    | NM_000546.5       | missense | CTA | 4  | p.Pro871Leu  | c.260C>T  |
| 288 | chr16:2129190   | SNV | C                                                                         | C/T                                                                                                                                             | C/C                                                                                                                                           | TSC2    | NM_000548.4       | missense | TCG | 27 | p.Pro1042Ser | c.3124C>T |
| 289 | chr22:41533685  | SNV | C                                                                         | C/T                                                                                                                                             | C/C                                                                                                                                           | EP300   | NM_001429.3       | missense | TCG | 8  | p.Pro551Ser  | c.1651C>T |
| 290 | chr9:139399393  | SNV | G                                                                         | G/A                                                                                                                                             | G/G                                                                                                                                           | NOTCH1  | NM_017617.4       | nonsense | TAG | 26 | p.Gln1584Ter | c.4750C>T |
| 291 | chr19:1220496   | SNV | G                                                                         | G/A                                                                                                                                             | G/G                                                                                                                                           | STK11   | NM_000455.4       | missense | ATG | 4  | p.Val197Met  | c.589G>A  |
| 292 | chr11:108203561 | SNV | G                                                                         | G/A                                                                                                                                             | G/G                                                                                                                                           | ATM     | NM_000051.3       | missense | AAG | 53 | p.Glu2621Lys | c.7861G>A |
| 293 | chr16:3820669   | SNV | G                                                                         | G/A                                                                                                                                             | G/G                                                                                                                                           | CREBBP  | NM_004380.2       | missense | TCG | 14 | p.Pro928Ser  | c.2782C>T |
| 294 | chr19:11121103  | SNV | C                                                                         | C/T                                                                                                                                             | C/C                                                                                                                                           | SMARCA4 | NM_001128849<br>1 | missense | TTT | 15 | p.Leu724Phe  | c.2170C>T |
| 295 | chr12:49432015  | SNV | G                                                                         | G/A                                                                                                                                             | G/G                                                                                                                                           | KMT2D   | NM_003482.3       | missense | TTC | 34 | p.Leu3042Phe | c.9124C>T |
| 296 | chr4:1808916    | SNV | CAG                                                                       | CAG/CAA                                                                                                                                         | CAG/CAG                                                                                                                                       | FGFR3   | NM_001163213<br>1 | missense | AGG | 18 | p.Gly786Arg  | c.2356G>A |
| 297 | chr11:108143259 | SNV | G                                                                         | G/A                                                                                                                                             | G/G                                                                                                                                           | ATM     | NM_000051.3       | nonsense | TGA | 21 | p.Trp1026Ter | c.3078G>A |
| 298 | chr3:41266927   | SNV | C                                                                         | C/T                                                                                                                                             | C/C                                                                                                                                           | CTNNB1  | NM_001904.3       | missense | TGT | 5  | p.Arg200Cys  | c.598C>T  |
| 299 | chr12:56478860  | SNV | C                                                                         | C/T                                                                                                                                             | C/C                                                                                                                                           | ERBB3   | NM_001982.3       | nonsense | TGA | 3  | p.Arg106Ter  | c.316C>T  |
| 300 | chr1:27089742   | SNV | G                                                                         | G/A                                                                                                                                             | G/G                                                                                                                                           | ARID1A  | NM_006015.4       | missense | ACC | 8  | p.Ala900Thr  | c.2698G>A |



|     |                 |     |    |       |       |         |                |          |     |    |              |            |
|-----|-----------------|-----|----|-------|-------|---------|----------------|----------|-----|----|--------------|------------|
| 301 | chr11:108180945 | SNV | G  | G/A   | G/G   | ATM     | NM_000051.3    | missense | ATT | 39 | p.Val194Ile  | c.5821G>A  |
| 302 | chr19:11141498  | SNV | G  | G/A   | G/G   | SMARCA4 | NM_001128349.1 | missense | AGG | 25 | p.Gly1159Arg | c.3475G>A  |
| 303 | chr19:11113756  | SNV | G  | G/A   | G/G   | SMARCA4 | NM_001128349.1 | missense | ATG | 12 | p.Val622Met  | c.1864G>A  |
| 304 | chr17:7577551   | SNV | C  | C/T   | C/C   | TP53    | NM_000546.5    | missense | AGC | 7  | p.Gly244Ser  | c.730G>A   |
| 305 | chr22:41560094  | SNV | C  | C/T   | C/C   | EP300   | NM_001429.3    | nonsense | TAG | 22 | p.Gln1256Ter | c.3766C>T  |
| 306 | chr16:3831230   | SNV | G  | G/T   | G/G   | CREBBP  | NM_004380.2    | missense | ATT | 7  | p.Leu551Ile  | c.1651C>A  |
| 307 | chr17:7577604   | SNV | C  | C/T   | C/C   | TP53    | NM_000546.5    | missense | GAC | 7  | p.Gly226Asp  | c.677G>A   |
| 308 | chr11:108199797 | SNV | G  | G/A   | G/G   | ATM     | NM_000051.3    | missense | AAA | 49 | p.Arg2380Lys | c.7139G>A  |
| 309 | chr9:139395206  | SNV | G  | G/A   | G/G   | NOTCH1  | NM_017617.3    | missense | TTC | 31 | p.Ser1911Phe | c.5732C>T  |
| 310 | chr1:27101090   | SNV | C  | C/T   | C/C   | ARID1A  | NM_006015.4    | nonsense | TAG | 18 | p.Gln1458Ter | c.4372C>T  |
| 311 | chr12:46244770  | SNV | C  | C/T   | C/C   | ARID2   | NM_152641.2    | missense | CTA | 15 | p.Pro955Leu  | c.2864C>T  |
| 312 | chr11:118375261 | SNV | G  | G/A   | G/G   | KMT2A   | NM_001197104.1 | missense | GAT | 27 | p.Gly2885Asp | c.8654G>A  |
| 313 | chr1:243668597  | SNV | C  | C/T   | C/C   | AKT3    | NM_005465.4    | missense | CAG | 13 | p.Arg465Gln  | c.1394G>A  |
| 314 | chr3:189604245  | SNV | G  | G/A   | G/G   | TP63    | NM_003722.4    | missense | AAC | 11 | p.Ser171Asn  | c.1412G>A  |
| 315 | chr1:120471812  | SNV | C  | C/T   | C/C   | NOTCH2  | NM_024408.3    | missense | AAT | 23 | p.Asp1227Asn | c.3679G>A  |
| 316 | chr12:46244329  | SNV | T  | T/C   | T/T   | ARID2   | NM_152641.2    | missense | ACA | 15 | p.Ile808Thr  | c.2423T>C  |
| 317 | chr9:139395006  | SNV | G  | G/A   | G/G   | NOTCH1  | NM_017617.3    | nonsense | TAG | 31 | p.Gln1973Ter | c.5932C>T  |
| 318 | chr3:178941873  | SNV | A  | A/G   | A/A   | PIK3CA  | NM_006218.3    | missense | CGG | 15 | p.Gln731Arg  | c.2192A>G  |
| 319 | chr1:120466273  | SNV | G  | G/A   | G/G   | NOTCH2  | NM_024408.3    | nonsense | TAG | 26 | p.Gln1616Ter | c.4846C>T  |
| 320 | chr3:41275750   | SNV | C  | C/T   | C/C   | CTNNB1  | NM_001904.3    | missense | TGC | 10 | p.Arg549Cys  | c.1645G>T  |
| 321 | chr9:139399338  | SNV | G  | G/A   | G/G   | NOTCH1  | NM_017617.3    | missense | ATC | 26 | p.Thr1602Ile | c.4805G>T  |
| 322 | chr3:189607197  | SNV | C  | C/T   | C/C   | TP63    | NM_003722.4    | missense | TCT | 12 | p.Pro526Ser  | c.1576C>T  |
| 323 | chr16:2108755   | SNV | A  | A/G   | A/A   | TSC2    | NM_000548.3    | missense | GTG | 10 | p.Met286Val  | c.856A>G   |
| 324 | chr12:49446075  | SNV | G  | G/A   | G/G   | KMT2D   | NM_003482.3    | missense | GTA | 10 | p.Ala464Val  | c.1391C>T  |
| 325 | chr22:41574040  | SNV | G  | G/A   | G/G   | EP300   | NM_001429.3    | missense | AGG | 31 | p.Gly2109Arg | c.6325G>A  |
| 326 | chr7:140453137  | SNV | C  | C/T   | C/C   | BRAF    | NM_004333.4    | missense | ATG | 15 | p.Val600Met  | c.1798G>A  |
| 327 | chr12:56492572  | SNV | G  | G/T   | G/G   | ERBB3   | NM_001982.3    | missense | TGG | 23 | p.Gly908Trp  | c.2722G>T  |
| 328 | chr19:11129670  | SNV | G  | G/A   | G/G   | SMARCA4 | NM_001128349.1 | missense | ACC | 17 | p.Ala826Thr  | c.2476G>A  |
| 329 | chr15:41989061  | SNV | G  | G/A   | G/G   | MGA     | NM_001164273.1 | missense | CAA | 3  | p.Arg618Gln  | c.1853G>A  |
| 330 | chr3:41266906   | SNV | C  | C/T   | C/C   | CTNNB1  | NM_001904.3    | nonsense | TAG | 5  | p.Gln193Ter  | c.577C>T   |
| 331 | chr17:37866420  | SNV | C  | C/T   | C/C   | ERBB2   | NM_004448.3    | missense | GTC | 6  | p.Ala242Val  | c.725C>T   |
| 332 | chr12:49444366  | SNV | G  | G/A   | G/G   | KMT2D   | NM_003482.3    | missense | CTC | 11 | p.Pro1002Leu | c.3005G>T  |
| 333 | chr16:2131719   | SNV | G  | G/A   | G/G   | TSC2    | NM_000548.4    | missense | CAG | 31 | p.Arg1245Gln | c.3734G>A  |
| 334 | chr1:120461167  | SNV | G  | G/A   | G/G   | NOTCH2  | NM_024408.3    | missense | TGC | 32 | p.Arg1931Cys | c.5791C>T  |
| 335 | chr11:108196144 | SNV | G  | G/A   | G/G   | ATM     | NM_000051.3    | missense | CAC | 46 | p.Arg227His  | c.6680G>A  |
| 336 | chr19:10600364  | SNV | C  | C/T   | C/C   | KEAP1   | NM_203500.1    | nonsense | TGA | 4  | p.Trp497Ter  | c.1491G>A  |
| 337 | chr16:3779313   | SNV | G  | G/A   | G     | CREBBP  | NM_004380.2    | missense | TTA | 31 | p.Ser1912Leu | c.5735C>T  |
| 338 | chr17:29552264  | SNV | C  | C/T   | C/C   | NF1     | NM_001042492.2 | missense | TTT | 17 | p.Ser666Phe  | c.1997C>T  |
| 339 | chr13:48955452  | SNV | T  | T/A   | T/T   | RB1     | NM_000321.2    | nonsense | TAA | 17 | p.Leu523Ter  | c.1568T>A  |
| 340 | chr17:7578442   | SNV | TA | TA/CA | TA/TA | TP53    | NM_000546.5    | missense | TGC | 5  | p.Tyr163Cys  | c.488A>G   |
| 341 | chr7:116435757  | SNV | C  | C/T   | C/C   | MET     | NM_001127500.1 | missense | TCT | 20 | p.Pro1301Ser | c.3901C>T  |
| 342 | chr17:7579876   | SNV | G  | G/A   | G/G   | TP53    | NM_000546.5    | missense | TCT | 2  | p.Pro13Ser   | c.37C>T    |
| 343 | chr7:140481380  | SNV | C  | C/T   | C/C   | BRAF    | NM_004333.4    | nonsense | TGA | 11 | p.Trp476Ter  | c.1428G>A  |
| 344 | chr16:2136299   | SNV | G  | G/A   | G/G   | TSC2    | NM_000548.3    | missense | AAC | 37 | p.Asp1590Asn | c.4768G>A  |
| 345 | chr12:49420847  | SNV | G  | G/A   | G/G   | KMT2D   | NM_003482.3    | missense | TCT | 48 | p.Pro4968Ser | c.14902C>T |
| 346 | chr3:47162636   | SNV | G  | G/A   | G/G   | SETD2   | NM_014159.6    | nonsense | TAG | 3  | p.Gln1164Ter | c.3490C>T  |
| 347 | chr16:3778479   | SNV | C  | C/T   | C/C   | CREBBP  | NM_004380.2    | missense | CAA | 31 | p.Arg2190Gln | c.6569G>A  |
| 348 | chr16:2121535   | SNV | C  | C/T   | C/C   | TSC2    | NM_000548.3    | missense | TGG | 18 | p.Arg622Trp  | c.1864C>T  |
| 349 | chr6:93982107   | SNV | C  | C/T   | C/C   | EPHA7   | NM_004440.3    | missense | AAA | 6  | p.Arg453Lys  | c.1358G>A  |
| 350 | chr16:2125886   | SNV | C  | C/T   | C/C   | TSC2    | NM_000548.3    | missense | TCC | 23 | p.Pro878Ser  | c.2632C>T  |
| 351 | chr7:116403126  | SNV | C  | C/T   | C/C   | MET     | NM_001127500.2 | missense | TTA | 11 | p.Ser814Leu  | c.2441C>T  |
| 352 | chr1:27101066   | SNV | G  | G/A   | G/G   | ARID1A  | NM_006015.4    | missense | AGC | 18 | p.Gly1450Ser | c.4348G>A  |
| 353 | chr1:27106648   | SNV | G  | G/A   | G/G   | ARID1A  | NM_006015.4    | missense | AGA | 20 | p.Gly2087Arg | c.6259G>A  |
| 354 | chr1:120462063  | SNV | C  | C/T   | C/C   | NOTCH2  | NM_024408.3    | missense | ACC | 31 | p.Ala1885Thr | c.5653G>A  |
| 355 | chr9:139407900  | SNV | C  | C/T   | C/C   | NOTCH1  | NM_017617.3    | missense | GAC | 14 | p.Gly766Asp  | c.2297G>A  |
| 356 | chr16:3779787   | SNV | C  | C/T   | C/C   | CREBBP  | NM_004380.2    | missense | AAC | 31 | p.Ser1754Asn | c.5261G>A  |
| 357 | chr1:120506301  | SNV | C  | C/T   | C/C   | NOTCH2  | NM_024408.3    | missense | TAC | 11 | p.Cys604Tyr  | c.1811G>A  |
| 358 | chr1:27101571   | SNV | C  | C/T   | C/C   | ARID1A  | NM_006015.4    | missense | CTC | 18 | p.Pro1618Leu | c.4853C>T  |
| 359 | chr1:27106354   | SNV | C  | C/T   | C/C   | ARID1A  | NM_006015.4    | nonsense | TGA | 20 | p.Arg1989Ter | c.5965C>T  |
| 360 | chr19:1220689   | SNV | T  | T/C   | T/T   | STK11   | NM_000455.4    | missense | GCG | 5  | p.Val236Ala  | c.707T>C   |

|     |                 |       |         |           |                 |         |                |                       |     |    |                    |                     |
|-----|-----------------|-------|---------|-----------|-----------------|---------|----------------|-----------------------|-----|----|--------------------|---------------------|
| 361 | chr3:41266130   | SNV   | G       | G/A       | G/G             | CTINB1  | NM_001904.3    | missense              | ACT | 3  | p.Ala43Thr         | c.127G>A            |
| 362 | chr7:55266502   | SNV   | C       | C/T       | C/C             | EGFR    | NM_005228.3    | missense              | TGC | 23 | p.Arg932Cys        | c.2794G>T           |
| 363 | chr9:21971105   | SNV   | C       | C/T       | C/C             | CDKN2A  | NM_001195132.1 | missense              | ACT | 2  | p.Ala85Thr         | c.253G>A            |
| 364 | chr14:105246553 | SNV   | C       | C/T       | G/C             | AKT1    | NM_001014431.1 | missense              | GAG | 3  | p.Gly16Glu         | c.47G>A             |
| 365 | chr16:2126143   | SNV   | G       | G/A       | G/G             | TSC2    | NM_000548.4    | missense              | CAG | 24 | p.Arg905Gln        | c.2714G>A           |
| 366 | chr1:120462030  | SNV   | G       | G/A       | G/G             | NOTCH2  | NM_024408.3    | missense              | TTC | 31 | p.Leu189Phe        | c.5686G>T           |
| 367 | chr17:7579882   | SNV   | C       | C/G       | C/C             | TP53    | NM_000546.5    | missense              | CAG | 2  | p.Glu11Gln         | c.31G>C             |
| 368 | chr17:37863308  | SNV   | C       | G/T       | C/C             | ERBB2   | NM_004448.3    | missense              | TGC | 2  | p.Arg47Cys         | c.139G>T            |
| 369 | chr3:41274899   | SNV   | G       | G/A       | G/G             | CTINB1  | NM_001904.3    | nonsense              | TGA | 8  | p.Tip383Ter        | c.1149G>A           |
| 370 | chr12:49421101  | SNV   | C       | C/T       | C/C             | KMT2D   | NM_003482.3    | missense              | AAC | 48 | p.Ser4883Asn       | c.14648G>A          |
| 371 | chr9:21971098   | SNV   | C       | C/T       | C/C             | CDKN2A  | NM_001195132.1 | missense              | CAG | 2  | p.Arg87Gln         | c.260G>A            |
| 372 | chr1:27057947   | SNV   | C       | C/T       | C/C             | ARID1A  | NM_006015.4    | missense              | TTA | 3  | p.Ser552Leu        | c.1655G>T           |
| 373 | chr1:120539871  | SNV   | G       | G/A       | G/G             | NOTCH2  | NM_024408.3    | missense              | TTC | 4  | p.Ser167Phe        | c.500C>T            |
| 374 | chr1:27099397   | SNV   | C       | C/T       | C/C             | ARID1A  | NM_006015.4    | nonsense              | TAG | 14 | p.Gln1212Ter       | c.3634C>T           |
| 375 | chr19:11121131  | SNV   | C       | C/T       | C/C             | SMARCA4 | NM_001128849.1 | missense              | GTC | 15 | p.Ala733Val        | c.2198C>T           |
| 376 | chr4:20591290   | SNV   | G       | G/A       | G/G             | SLIT2   | NM_004787.3    | missense              | AAC | 30 | p.Asp1038Asn       | c.3112G>A           |
| 377 | chr8:38271477   | SNV   | C       | C/T       | C/C             | FGFR1   | NM_001174067.1 | missense              | ATG | 18 | p.Val782Met        | c.2344G>A           |
| 378 | chr7:140453142  | SNV   | G       | G/A       | G/G             | BRAF    | NM_004333.4    | missense              | GTT | 15 | p.Ala598Val        | c.1793C>T           |
| 379 | chr9:139402765  | SNV   | G       | G/A       | G/G             | NOTCH1  | NM_017617.4    | missense              | TGC | 20 | p.Arg1082Cys       | c.3244C>T           |
| 380 | chr1:120465043  | SNV   | G       | G/A       | G/G             | NOTCH2  | NM_024408.3    | nonsense              | TAG | 28 | p.Gln1677Ter       | c.5029C>T           |
| 381 | chr17:7578476   | SNV   | G       | G/T       | G/G             | TP53    | NM_000546.5    | missense              | ACG | 5  | p.Pro152Thr        | c.454C>A            |
| 382 | chr4:20490588   | SNV   | G       | G/A       | G/G             | SLIT2   | NM_004787.3    | missense              | CAA | 8  | p.Arg253Gln        | c.758G>A            |
| 383 | chr12:49421652  | SNV   | C       | C/G       | C/C             | KMT2D   | NM_003482.3    | missense              | CAC | 47 | p.Gln4859His       | c.14577G>C          |
| 384 | chr19:40741178  | SNV   | G       | G/A       | G/G             | AKT2    | NM_001626.5    | nonsense              | TAG | 12 | p.Gln419Ter        | c.1255C>T           |
| 385 | chr17:29553582  | SNV   | C       | C/T       | C/C             | NF1     | NM_001042492.2 | missense              | TGC | 18 | p.Arg711Cys        | c.2131C>T           |
| 386 | chr22:41573611  | SNV   | G       | G/A       | G/G             | EP300   | NM_001429.3    | missense              | AGT | 31 | p.Gly1966Ser       | c.5896G>A           |
| 387 | chr19:11105622  | SNV   | G       | G/A       | G/G             | SMARCA4 | NM_001128849.1 | missense              | CAG | 9  | p.Arg513Gln        | c.1538G>A           |
| 388 | chr11:118348807 | SNV   | C       | C/T       | C/C             | KMT2A   | NM_001197104.1 | missense              | TGG | 5  | p.Arg1154Tyr       | c.3460C>T           |
| 389 | chr16:2134274   | SNV   | G       | G/A       | G/G             | TSC2    | NM_000548.4    | missense              | AAG | 34 | p.Glu1351Lys       | c.4051G>A           |
| 390 | chr13:48916766  | SNV   | G       | G/A       | G/G             | RB1     | NM_000321.2    | nonsense              | TAG | 3  | p.Tyr99Ter         | c.296G>A            |
| 391 | chr7:55259554   | SNV   | C       | C/G       | C/C             | EGFR    | NM_005228.4    | missense              | GGA | 21 | p.Ala871Gly        | c.2612C>G           |
| 392 | chr15:41988745  | SNV   | G       | G/A       | G/G             | MGA     | NM_001164273.1 | missense              | AAA | 3  | p.Glu513Lys        | c.1537G>A           |
| 393 | chr1:27057884   | SNV   | C       | C/T       | C/C             | ARID1A  | NM_006015.4    | missense              | CTG | 3  | p.Pro531Leu        | c.1592C>T           |
| 394 | chr16:3808917   | SNV   | G       | G/A       | G/G             | CREBBP  | NM_004380.2    | nonsense              | TGA | 17 | p.Arg1103Ter       | c.3307C>T           |
| 395 | chr17:7577099   | SNV   | C       | C/T       | C/C             | TP53    | NM_000546.5    | missense              | AAA | 8  | p.Arg280Lys        | c.839G>A            |
| 396 | chr7:55242485   | SNV   | C       | C/T       | C/C             | EGFR    | NM_005228.3    | missense              | TTT | 19 | p.Ser752Phe        | c.2255C>T           |
| 397 | chr7:55241644   | SNV   | G       | G/A       | G/G             | EGFR    | NM_005228.3    | missense              | ACT | 18 | p.Ala698Thr        | c.2092G>A           |
| 398 | chr7:55249071   | SNV   | C       | C/T       | C/C             | EGFR    | NM_005228.3    | missense              | ATG | 20 | p.Thr790Met        | c.2369C>T           |
| 399 | chr11:108203577 | INDEL | CTTATA  | CTTATA/C  | CTTATA/CTTATA   | ATM     | NM_000051.3    | frameshiftDeletion    | AGC | 53 | p.Ile2629fs        | c.7878_7882delTTATA |
| 400 | chr17:7578526   | INDEL | CAA     | CAA/C     | CAA/CAA         | TP53    | NM_000546.5    | frameshiftDeletion    | TTG | 5  | p.Phe134fs         | c.402_403delTT      |
| 401 | chr17:7578526   | INDEL | CAA     | CAA/C     | CAA/CAA         | TP53    | NM_000546.5    | frameshiftDeletion    | TTG | 5  | p.Phe134fs         | c.402_403delTT      |
| 402 | chr1:27101116   | INDEL | A       | A/A       | A/A             | ARID1A  | NM_006015.4    | frameshiftInsertion   | TGG | 18 | p.Gly1469fs        | c.4398_4399insC     |
| 403 | chr10:89653795  | INDEL | CATT    | CATT/C    | CATT/CATT       | PTEN    | NM_000314.4    | nonframeshiftDeletion | -   | 2  | p.Ile32del         | c.94_96delATT       |
| 404 | chr15:66729095  | INDEL | GGAGATC | GGAGATC/G | GGAGATC/GGAGATC | MAP2K1  | NM_002755.3    | nonframeshiftDeletion | -   | 3  | p.Glu102_1le103del | c.304_309delGAGATC  |
| 405 | chr17:7578463   | INDEL | CG      | CG/C      | CG/CG           | TP53    | NM_000546.5    | frameshiftDeletion    | GCG | 5  | p.Arg156fs         | c.466delC           |
| 406 | chr17:7576918   | INDEL | TG      | TG/T      | TG/TG           | TP53    | NM_000546.5    | frameshiftDeletion    | ACA | 9  | p.Asn310fs         | c.927delC           |
| 407 | chr17:7578397   | INDEL | TG      | TG/T      | TG/TG           | TP53    | NM_000546.5    | frameshiftDeletion    | ACC | 5  | p.His178fs         | c.532delC           |
| 408 | chr17:7578475   | INDEL | G       | G/GT      | G/G             | TP53    | NM_000546.5    | frameshiftInsertion   | CAC | 5  | p.Pro152fs         | c.454_455insA       |
| 409 | chr17:7577064   | INDEL | TC      | TC/T      | TG/TC           | TP53    | NM_000546.5    | frameshiftDeletion    | AGC | 8  | p.Glu294fs         | c.873delG           |
| 410 | chr11:108203577 | INDEL | CTTATA  | CTTATA/C  | /               | ATM     | NM_000051.3    | frameshiftDeletion    | AGC | 53 | p.Ile2629fs        | c.7878_7882delTTATA |
| 411 | chr17:7579315   | INDEL | G       | G/GC      | G/G             | TP53    | NM_000546.5    | frameshiftInsertion   | TGG | 4  | p.Cys124fs         | c.371_372insG       |
| 412 | chr17:7579315   | INDEL | G       | G/GC      | G/G             | TP53    | NM_000546.5    | frameshiftInsertion   | TGG | 4  | p.Cys124fs         | c.371_372insG       |

**Table S2.** Occurrence of mutations according to the location of cancer.

|                                          | <b>Superior (n = 84)</b> | <b>Inferior (n = 56)</b>  | <i>p</i> value  |
|------------------------------------------|--------------------------|---------------------------|-----------------|
| Presence/absence of <i>EGFR</i> mutation | 19/65                    | 15/41                     | <i>p</i> = 0.57 |
| Presence/absence of <i>KRAS</i> mutation | 15/69                    | 14/42                     | <i>p</i> = 0.31 |
| Presence/absence of <i>TP53</i> mutation | 54/30                    | 32/24                     | <i>p</i> = 0.40 |
|                                          | <b>Anterior (n = 29)</b> | <b>Posterior (n = 59)</b> | <i>p</i> value  |
| Presence/absence of <i>EGFR</i> mutation | 11/18                    | 13/46                     | <i>p</i> = 0.12 |
| Presence/absence of <i>KRAS</i> mutation | 5/24                     | 15/44                     | <i>p</i> = 0.38 |
| Presence/absence of <i>TP53</i> mutation | 15/14                    | 33/26                     | <i>p</i> = 0.71 |

**Table S3.** The genes targeted in the cancer panel.

| No | Gene Symbol | Chromosome | Number of Amplicons | Total Bases | Covered Bases | Overall Coverage |
|----|-------------|------------|---------------------|-------------|---------------|------------------|
| 1  | AKT1        | chr14      | 26                  | 1573        | 1497          | 95%              |
| 2  | AKT2        | chr19      | 27                  | 1576        | 1543          | 98%              |
| 3  | AKT3        | chr1       | 30                  | 1624        | 1624          | 100%             |
| 4  | ARID1A      | chr1       | 76                  | 7058        | 6023          | 85%              |
| 5  | ARID1B      | chr6       | 75                  | 6950        | 5965          | 86%              |
| 6  | ARID2       | chr12      | 71                  | 5718        | 5643          | 99%              |
| 7  | ASCL4       | chr12      | 5                   | 532         | 382           | 72%              |
| 8  | ATM         | chr11      | 147                 | 9791        | 9439          | 96%              |
| 9  | BRAF        | chr7       | 37                  | 2481        | 2224          | 90%              |
| 10 | CDKN2A      | chr9       | 9                   | 962         | 612           | 64%              |
| 11 | COBL        | chr7       | 48                  | 4151        | 3977          | 96%              |
| 12 | CREBBP      | chr16      | 96                  | 7639        | 7071          | 93%              |
| 13 | CTNNB1      | chr3       | 32                  | 2486        | 2486          | 100%             |
| 14 | CUL3        | chr2       | 42                  | 2561        | 2495          | 97%              |
| 15 | EGFR        | chr7       | 60                  | 4189        | 4135          | 99%              |
| 16 | EP300       | chr22      | 90                  | 7555        | 7182          | 95%              |
| 17 | EPHA7       | chr6       | 44                  | 3175        | 3154          | 99%              |
| 18 | ERBB2       | chr17      | 57                  | 4080        | 3808          | 93%              |
| 19 | ERBB3       | chr12      | 59                  | 4440        | 4374          | 99%              |
| 20 | FGFR1       | chr8       | 41                  | 2825        | 2816          | 100%             |
| 21 | FGFR2       | chr10      | 43                  | 2910        | 2842          | 98%              |
| 22 | FGFR3       | chr4       | 34                  | 2752        | 2215          | 81%              |
| 23 | FOXP2       | chr7       | 36                  | 2487        | 2469          | 99%              |
| 24 | HRAS        | chr11      | 11                  | 683         | 683           | 100%             |
| 25 | KEAP1       | chr19      | 24                  | 1925        | 1845          | 96%              |
| 26 | KMT2D       | chr12      | 192                 | 17154       | 15854         | 92%              |
| 27 | KRAS        | chr12      | 10                  | 737         | 681           | 92%              |
| 28 | MAP2K1      | chr15      | 18                  | 1292        | 1239          | 96%              |
| 29 | MET         | chr7       | 59                  | 4427        | 4396          | 99%              |
| 30 | MGA         | chr15      | 110                 | 9428        | 9345          | 99%              |
| 31 | MLL         | chr11      | 144                 | 12,279      | 11875         | 97%              |
| 32 | NF1         | chr17      | 136                 | 9161        | 9023          | 99%              |
| 33 | NFE2L2      | chr2       | 23                  | 1868        | 1826          | 98%              |
| 34 | NOTCH1      | chr9       | 99                  | 8008        | 7078          | 88%              |
| 35 | NOTCH2      | chr1       | 101                 | 7809        | 7539          | 97%              |
| 36 | NRAS        | chr1       | 9                   | 610         | 610           | 100%             |
| 37 | PIK3CA      | chr3       | 50                  | 3407        | 3282          | 96%              |
| 38 | PTEN        | chr10      | 18                  | 1302        | 1223          | 94%              |
| 39 | RASA1       | chr5       | 55                  | 3412        | 3216          | 94%              |
| 40 | RB1         | chr13      | 55                  | 3057        | 2902          | 95%              |
| 41 | RBM10       | chrX       | 48                  | 3228        | 3079          | 95%              |
| 42 | RIT1        | chr1       | 13                  | 771         | 771           | 100%             |
| 43 | SETD2       | chr3       | 91                  | 7905        | 7663          | 97%              |
| 44 | SLIT2       | chr4       | 76                  | 4972        | 4854          | 98%              |
| 45 | SMAD4       | chr18      | 24                  | 1769        | 1715          | 97%              |

|    |         |       |    |      |      |     |
|----|---------|-------|----|------|------|-----|
| 46 | SMARCA4 | chr19 | 74 | 5399 | 5055 | 94% |
| 47 | SOX2    | chr3  | 9  | 964  | 883  | 92% |
| 48 | STK11   | chr19 | 23 | 1392 | 1343 | 97% |
| 49 | TP53    | chr17 | 22 | 1383 | 1351 | 98% |
| 50 | TP63    | chr3  | 34 | 2360 | 2227 | 94% |
| 51 | TSC1    | chr9  | 49 | 3705 | 3603 | 97% |
| 52 | TSC2    | chr16 | 92 | 5834 | 5677 | 97% |
| 53 | U2AF1   | chr21 | 15 | 880  | 870  | 99% |

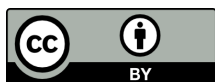

© 2020 by the authors. Licensee MDPI, Basel, Switzerland. This article is an open access article distributed under the terms and conditions of the Creative Commons Attribution (CC BY) license (<http://creativecommons.org/licenses/by/4.0/>).
